# Supplementary material
Source: publisher site journal article supplement (https://www.dovepress.com/article/454913)
Supplement: Supplementary file 1 [file get_supplementary_file.php]

**Appendix**

**Table of Contents**

**Appendix** [**S1 Data source and database establishment** 3](#_Toc161047875)

**Appendix** [**S2 Experimental methodology** 5](#_Toc161047876)

[S2.1 *Strain isolation and culture, strain identification, drug sensitivity experiment and strain preservation and resuscitation* 5](#_Toc161047877)

[*S2.1.1 Mycobacterium Isolation and Culture Test Process and Result Reading Standard* 6](#_Toc161047878)

[*S2.1.2 Mycobacterial Species Identification Test Process and Result Reading Standard* 8](#_Toc161047879)

[*S2.1.3 Mycobacterium drug susceptibility test process and result reading standard* 10](#_Toc161047880)

[*S2.2 Extraction of Mycobacterium DNA* 14](#_Toc161047881)

[*S2.2.1 Quality Test Results of Mycobacterium Tuberculosis DNA Purification* 16](#_Toc161047882)

[*S2.3 Whole Genome Sequencing* 23](#_Toc161047883)

**Appendix** [**S3 Data analysis** 24](#_Toc161047884)

[*S3.1 Biological information analysis* 24](#_Toc161047885)

[*S3.1.1 Mapping and variant calling reads of Illumina* 24](#_Toc161047886)

[*S3.1.2 Phylogenetic reconstruction* 24](#_Toc161047887)

[*S3.1.3 Lineage and antimicrobial resistance prediction* 25](#_Toc161047888)

[*S3.2 Statistical analysis* 25](#_Toc161047889)

**Appendix** [**S4 Supplement Results(Table):** **Demographic and clinical characteristics** 26](#_Toc161047890)

**Appendix** [**S5 Supplement Results(Table): Phenotypic resistance profiles (drug resistance status of 207 drug-resistant tuberculosis strains)** 28](#_Toc161047891)

**Appendix** [**S6 Supplement Results(Table): Phenotypic resistance profiles (drug resistance spectrum)** 1](#_Toc161047892)

**Appendix** [**S7 Supplement Results (Results describe and Table): Molecular resistance characterization** 4](#_Toc161047893)

[*S7.1 Molecular drug-resistance characteristics of 207 drug-resistant tuberculosis strains (1)* 6](#_Toc161047894)

[*S7.2 Molecular characteristics of 207 drug-resistant tuberculosis strains (2)* 10](#_Toc161047895)

**Appendix** [**S8 Supplement Results (Results describe and Table): Comparison of phenotypic resistance and molecular mutation** 29](#_Toc161047896)

[*S8.1 Comparison of phenotypic drug-resistant and molecular drug-resistant* 32](#_Toc161047897)

[*S8.2 Estimation of diagnostic strength of drug resistance in Mycobacterium tuberculosis with different drug resistance gene mutations* 33](#_Toc161047898)

[*S8.3 Mutated genes with differences in distribution between phenotypically resistant and sensitive groups were compared with the 2nd edition of the WHO mutation catalog* 35](#_Toc161047899)

**Appendix** [**S9 Supplement Results (Results describe and Table): Phylogenetic analysis** 38](#_Toc161047900)

[*S9.1 Model Selection* 41](#_Toc161047901)

[*S9.2 Comparison of S, O and MFX between L2 and L3* 43](#_Toc161047902)

[*S9.3 Comparison of S, O and MFX between L2 and L4* 44](#_Toc161047903)

[*S9.4 Comparison of S, O and MFX between L3 and L4* 45](#_Toc161047904)

[*S9.5 Comparison of MR-TB between L2 and L3* 46](#_Toc161047905)

[*S9.6 Comparison of MR-TB between L2 and L4* 47](#_Toc161047906)

[*S9.7 Comparison of MR-TB between L2 and L4* 48](#_Toc161047907)

[*S9.8 Comparison of anti-tuberculosis drug resistance among L2, L3 and L4* 49](#_Toc161047908)

[*S9.9 Comparison of type of drug resistance among L2, L3 and L4* 50](#_Toc161047909)

[*S9.10 Patient information of 61 cluster strains (including information from field epidemiological investigation)* 51](#_Toc161047910)

[*S9.11 Result of spatiotemporal scan* 57](#_Toc161047911)

# **Appendix S1 Data source and database establishment**

The sample of mycobacteria that tested positive in culture has been identified as the mycobacterium tuberculosis complex (MTBC) through identification medium. This retrospective study was conducted based on routine national drug resistance surveillance in Urumqi. Demographic, epidemiological, and clinical information of suspected TB patients who visited eight TB sentinel hospitals in Urumqi from 1 January 2017 to 31 December 2021 was extracted from the National Drug Resistance Surveillance Database (NDRS, https://www.carss.cn/). The NDRS collects information through doctors at the eight TB sentinel hospitals in Urumqi by questioning patients during their visits. In addition to, sputum samples were collected from above population according to the national drug resistance surveillance protocol. The sputum specimens were selected in accordance with the *Technical Guidelines for Tuberculosis Prevention and Control in China* (https://tb.chinacdc.cn/xxjlg/202111/W020211119672904030470.pdf) inclusion and exclusion criteria.

After collect sputum samples, we isolated and cultured sputum samples derived mycobacteria on the Lowenstein-Jensen (L-J) media. Samples of culture-positive mycobacteria were screened with Roche identification medium for MTB identification. After final confirmation as MTB, initially, all strains of MTB underwent phenotypic DST using the proportional method on the solid culture medium. Subsequently, the strains were stored in a refrigerator at -80°C for freezing and preservation. Over the course of five years, a total of 219 drug-resistant MTB strains were collected, out of which 207 strains had complete patient information. These 207 MTB strains with complete patient information were then thawed, revived, and subjected to WGS. Finally, a comprehensive analysis was performed, considering patient information, phenotypic drug susceptibility test results, and WGS results. Our database consists of the above all data.

# **Appendix S2 Experimental methodology**

## S2.1 *Strain isolation and culture, strain identification, drug sensitivity experiment and* *strain preservation and resuscitation*

The strains were isolated and cultured using a simple mycobacteria method on solid culture. Sputum samples were pretreated with 4% NaOH and then inoculated into the acidic L-J medium. The cultures were incubated at a constant temperature of 37℃. Please refer to **S2.1.1** for a detailed description of the process and interpretation of the results. The strains were identified using P-Nitrobenzoic acid (PNB) and Thiophen-2-carboxylic acid hydrazide (TCH) identification medium. For the specific process and interpretation of the results, please see **S2.1.2**. A phenotypic DST was conducted using the proportion method in the mycobacterium solid drug sensitivity test. This study included the assessment of H, R, EMB, S, O, LFX, MXF, AM, KM, CPM and PAS. These eleven anti-tuberculosis drugs are required to be monitored according to China's Guidelines for TB Control Planning. For a detailed description of the process and interpretation of the results, please refer to **S2.1.3**. The mixed solution containing 7H9, OADC, and glycerol was used as the preservation solution for the strain. 1 ml of the separated mycobacteria and 1 ml of the preservation solution were added to a 2 ml strain cryopreservation tube, which was then placed in a refrigerator at -80℃ for preservation. Prior to extracting the nucleic acid from the strain, the strain was removed from the tube and inoculated into a neutral L-J medium. The medium was then placed in a constant temperature incubator at 37℃ for culture and resuscitation. Once the strain reached the late logarithmic growth stage, a bacterial suspension was prepared and the DNA of Mycobacterium was extracted.

### *S2.1.1 Mycobacterium Isolation and Culture Test Process and Result Reading Standard*

#### *Ⅰ. Mycobacterium isolation and culture steps*

- Transfer about 1 ~ 2 ml of the collected sputum specimen to the pretreatment tube in the biosafety cabinet;
- Depending on the characteristics of the specimen, add 4% NaOH solution about 1-4 times the volume of sputum into the pretreatment tube containing the sputum specimen;
- After screwing the screw cap of the pretreatment tube, place the pretreatment tube on a vortex oscillator for vortex oscillation for about 30s until the sputum specimen is fully liquefied. Let it stand at room temperature for 15 min;
- Unscrew the screw cap of L-J medium culture tube, check the solidified water at the bottom of the slant of the culture medium, if there is too much solidified water, discard the solidified water along the inner wall of the culture tube on the opposite side of the slant;
- Suck the sputum specimen after pretreatment with sterile pipette;
- Keep the slant level or the bottom of the culture medium slightly lower, and uniformly inoculate it on the slant of the acidic L-J medium, with 0.1-0.15ml (about 2-3 drops) for each culture medium. During inoculation, inoculate the first drop of liquid to the middle of the slant, and inoculate the second drop to the upper part of the culture medium;
- Screw the screw cap of the culture tube but avoid complete tightening;
- Gently rotate and lower the bottom of the culture tube, making the inoculated liquid evenly spread on the slant;
- Place the culture medium on a slant placing rack, and keeping the slant of the culture medium horizontally upward;
- Incubate the culture medium in a constant temperature incubator together with the slant placing rack, and set the temperature at 36±1℃; After 24 hours, tighten the screw cap of the culture tube, keep upright, and continue incubation at 36±1℃.

#### *Ⅱ. Results reading*

- Observe the culture on Day 3 and Day 7 after inoculation, and then once a week until the 8th weekend. After each observation, record the observation results in the record book of culture results;
- Visual judgment: the typical colony morphology of MTB is: opaque pale yellow, rough, dry, protruding from the culture medium, with some in cauliflower patterns. If it is found the medium is liquefied, or mould is present, contamination is reported;
- Based on the preliminary visual judgment, record the results according to the Criteria of S2.1.1.1:

**S2.1.1.1 Criteria for result interpretation**

| **Growing status** | **Results** |
| --- | --- |
| No colony growth | Culture negative is reported |
| When the colony growth is less than 1/4 of the slant area | Actual colony numbers are reported |
| Colonies occupy 1/4 of the slant area | Report (1 +) |
| Colonies occupy 1/2 of the slant area | Report (2+) |
| Colonies occupy 3/4 of the slant area | Report (3+) |
| Colonies cover the slant of the medium | Report (4+) |

- If medium contamination is found, it is reported by area of contamination (see S2.1.1.2)

**S2.1.1.2 Criteria for reported by area of contamination**

| **Contamination status** | **Results** |
| --- | --- |
| The contaminated bacteria have obvious boundaries not exceeding 1/4 of the slant area | Report (C1+) |
| The contaminated bacteria have obvious boundaries not exceeding 1/2 of the slant area | Report (C2+) |
| The contaminated bacteria have obvious boundaries not exceeding 3/4 of the slant area | Report(C3+) |
| The contaminating bacteria do not have a clear boundary or cover the slant of the medium | Report(C4+) |

### *S2.1.2 Mycobacterial Species Identification Test Process and Result Reading Standard*

#### *Ⅰ. Test procedures*

##### *ⅰ. Preparation of bacterial solution*

- Add 1-2 drops of 10% Tween -80 aqueous solution into a bacteria-grinding bottle;
- Scrape a half inoculation ring or an inoculation ring (about 5-10 mg) of fresh colonies in the late logarithmic phase with the tip of a sterile straw or a flame-sterilized inoculation ring, and place it into a bacteria-grinding bottle;
- Screw the bottle cap, and oscillate the bottle on a vortex oscillator for 10-20 s;
- Let it stand for 5min, carefully open the bottle cap, add about 2ml of sterilized normal saline, and let it stand for a while to precipitate large substances in the bacterial liquid;
- Suck up the middle and upper part of the bacterial solution with a sterile pipette, about 1ml, transfer it to another sterile test tube, and compare the turbidity with a standard McFarland turbidimetric tube (MacFarland No.1);
- Gradually add sterilized normal saline dropwise until the turbidity of the bacterial solution is consistent with that in the standard McFarland No.1 tube, and 1mg/ml bacterial solution is obtained.

##### *ⅱ. Inoculation*

- Bacterial liquid dilution: Add 2ml sterilized normal saline into a sterile test tube with a screw cap in a sterile manner for standby, one for each bacteria strain to be tested. The bacterial liquid is allowing to stand until particles or bacterial block are precipitated. Use 22 SWG standard inoculation ring to take 2 full rings of 1mg/ml of bacterial solution, translate it into 2ml of sterilized normal saline to dilute to 10-2mg/ml of bacterial solution;
- Inoculation: Take full ring (about 0.01 mL) of 10–2 mg/ml bacterial solution with a 22 SWG standard inoculation ring, and uniformly inoculate it onto the surface of PNB and TCH identification medium by streaking method. Attention should be paid to ensure that the bacterial solution was evenly dispersed on the inclined surface of the medium as possible.

##### *ⅲ. Culture*

- The inoculated medium is placed upright in constant temperature culture at 36±1℃ for 4 weeks and the results are reported.

##### *Ⅱ. Identification criteria*

Recording of results according to the criteria of S2.1.2.1.

S2.1.2.1 Criteria for identification of strain species

|  | **PNB** | **TCH** |
| --- | --- | --- |
| Mycobacterium tuberculosis(MTB) | - | + |
| Mycobacterium bovis | - | - |
| Nontuberculosis mycobacteria(NTM) | + | + |
| +: Grow on PNB or TCH;  -: Not Grow on PNB or TCH. | | |

### *S2.1.3 Mycobacterium drug susceptibility test process and result reading standard*

#### *Ⅰ. Test procedures*

##### *ⅰ. Preparation of bacterial solution*

- Add 1-2 drops of 10% Tween -80 aqueous solution into a bacteria-grinding bottle;
- Scrape a half inoculation ring or an inoculation ring (about 5-10 mg) of fresh colonies in the late logarithmic phase with the tip of a sterile straw or a flame-sterilized inoculation ring, and place it into a bacteria-grinding bottle;
- Screw the bottle cap, and oscillate the bottle on a vortex oscillator for 10-20 s;
- Let it stand for 5min, carefully open the bottle cap, add about 2ml of sterilized normal saline, and let it stand for a while to precipitate large substances in the bacterial liquid;
- Suck up the middle and upper part of the bacterial solution with a sterile pipette, about 1ml, transfer it to another sterile test tube, and compare the turbidity with a standard McFarland turbidimetric tube (McFarland No.1);
- Gradually add sterilized normal saline dropwise until the turbidity of the bacterial solution is consistent with that in the standard McFarland No.1 tube, and 1mg/ml bacterial solution is obtained.

##### *ⅱ. Inoculation*

- Bacterial liquid dilution: Add 2ml sterilized normal saline into a sterile test tube with a screw cap in a sterile manner for standby, two for each bacteria strain to be tested. The bacterial liquid is allow to stand until particles or bacterial block are precipitated. Use 22 SWG standard inoculation ring to take 2 full rings of 1mg/ml of bacterial solution, translate it into 2ml of sterilized normal saline to dilute to 10-2mg/ml of bacterial solution. Dilute by 100 times in the same way to obtain 10- 4mg/ml bacterial solution;
- Inoculation: Take full ring (about 0.01 mL) of 10–2 mg/ml and 10-4mg/ml bacterial solution with 22 SWG standard inoculation rings respectively, and evenly inoculate them onto the control and drug-containing medium surfaces by streaking method. Attention should be paid to ensure that the bacterial solution was evenly dispersed on the inclined surface of the medium as possible. The final amounts of inoculated bacteria should be 10-4mg and 10-6mg.

Further detailed information on the Drug concentration in medium and flow chart test is present in S2.1.3.1 and S2.1.3.2.

**S2.1.3.1 Drug concentration in medium**

| Drug | Drug concentration in medium（μg/ml） |
| --- | --- |
| Isoniazid | 0.2 |
| Rifampicin | 40 |
| Ethambutol | 2 |
| Streptomycin | 4 |
| Ofloxacin | 4 |
| Amikacin | 30 |
| Kanamycin | 30 |
| Capreomycin | 40 |
| Para-aminosalicylic-acid | 1 |
| Levofloxacin | 2 |
| Moxifloxacin | 2 |

Diluted to 10-4mg/ml bacterial suspension

Grinding bacteria

Fresh colonies 1-2 weeks after the appearance of visible colonies

Prepared to 1mg/ml bacterial suspension

Dilute 100 times

Diluted to 10-2mg/ml bacterial suspension

Dilute 100 times

Drug-free control medium

Inoculate 0.01ml

Inoculate 0.01ml

Drug-containing medium

**S2.1.3.2 Operation flow chart of proportional indirect method**

##### *ⅲ. Culture*

- The inoculated medium is placed upright in constant temperature culture at 36±1℃ for 4 weeks and the results are reported.

#### *Ⅱ. Results reading and resistance determination criteria*

##### *ⅰ. Interpretation of drug sensitivity growth*

Recording of results according to the criteria of S2.1.3.3.

**S2.1.3.3** Criteria for results of Phenotypic Drug Susceptibility Testing

| **Colony growth** | **Reporting method** |
| --- | --- |
| No colony growth | Negative |
| Less than 50 colonies | Actual number of colonies |
| 50~100 colonies | 1+ |
| 100~200 colonies | 2+ |
| Mostly fusion(200~500 colonies) | 3+ |
| Fusion (more than 500 colonies) | 4+ |

##### *ⅱ. Calculation and interpretation of percentage resistance*

Percentage of drug resistance(%) =

- If the percentage of resistance is greater than 1%, the test bacterium is considered to be resistant to the anti-tuberculosis drug.

## *S2.2 Extraction of Mycobacterium DNA*

Mycobacterium DNA was extracted by the manual membrane adsorption column method. PureLink™ microbiome DNA purification kit of Thermo Fisher Scientific company was used to extract mycobacterial DNA. Please refer to **USER GUIDE** ([https://assets.thermofisher.cn/TFS**-**Assets/LSG/manuals/MAN0014332_PureLinkMicrobiome_CultureMedia_UG.pdf](https://assets.thermofisher.cn/TFS-Assets/LSG/manuals/MAN0014332_PureLinkMicrobiome_CultureMedia_UG.pdf)) for detailed experimental procedures. After DNA extraction, the purity and integrity of DNA were detected by agarose gel electrophoresis and quantified by Qubit. The samples with grade D of DNA quality test results were discarded. Refer to **S2.2.1** for quality inspection results.

### *S2.2.1 Quality Test Results of Mycobacterium Tuberculosis DNA Purification*

| **Sample ID** | **Library Type** | **Concentration (ng/ul)** | **Volume(ul)** | **The total DNA (ug)** | **Conclusion** |
| --- | --- | --- | --- | --- | --- |
| Sample 001 | Tiny Fragments(180bp、300bp、500bp) | 2.0790 | 45.4760 | 0.0945 | A |
| Sample 002 | Tiny Fragments(180bp、300bp、501bp) | 3.5730 | 30.7379 | 0.1098 | A |
| Sample 003 | Tiny Fragments(180bp、300bp、502bp) | 9.5810 | 56.2858 | 0.5393 | A |
| Sample 004 | Tiny Fragments(180bp、300bp、503bp) | 8.3910 | 41.7066 | 0.3500 | A |
| Sample 005 | Tiny Fragments(180bp、300bp、504bp) | 0.9160 | 64.4706 | 0.0591 | C |
| Sample 006 | Tiny Fragments(180bp、300bp、505bp) | 1.1360 | 48.7683 | 0.0554 | C |
| Sample 007 | Tiny Fragments(180bp、300bp、506bp) | 4.3960 | 55.9562 | 0.2460 | A |
| Sample 008 | Tiny Fragments(180bp、300bp、507bp) | 4.6820 | 54.6679 | 0.2560 | A |
| Sample 009 | Tiny Fragments(180bp、300bp、508bp) | 1.4410 | 41.7963 | 0.0602 | C |
| Sample 010 | Tiny Fragments(180bp、300bp、509bp) | 1.6820 | 58.7733 | 0.0989 | A |
| Sample 011 | Tiny Fragments(180bp、300bp、510bp) | 1.4600 | 57.5744 | 0.0841 | A |
| Sample 012 | Tiny Fragments(180bp、300bp、511bp) | 1.7190 | 51.1036 | 0.0879 | A |
| Sample 013 | Tiny Fragments(180bp、300bp、512bp) | 8.2640 | 53.9490 | 0.4458 | A |
| Sample 014 | Tiny Fragments(180bp、300bp、513bp) | 4.8200 | 36.3249 | 0.1751 | A |
| Sample 015 | Tiny Fragments(180bp、300bp、514bp) | 1.9470 | 42.4244 | 0.0826 | A |
| Sample 016 | Tiny Fragments(180bp、300bp、515bp) | 1.5350 | 63.5408 | 0.0975 | A |
| Sample 017 | Tiny Fragments(180bp、300bp、516bp) | 2.7710 | 41.8562 | 0.1160 | A |
| Sample 018 | Tiny Fragments(180bp、300bp、517bp) | 9.1170 | 52.6010 | 0.4796 | A |
| Sample 019 | Tiny Fragments(180bp、300bp、518bp) | 8.0090 | 43.8890 | 0.3515 | A |
| Sample 020 | Tiny Fragments(180bp、300bp、519bp) | 3.7820 | 43.4697 | 0.1644 | A |
| Sample 021 | Tiny Fragments(180bp、300bp、520bp) | 4.6030 | 37.6999 | 0.1735 | A |
| Sample 022 | Tiny Fragments(180bp、300bp、521bp) | 5.2710 | 43.5894 | 0.2298 | A |
| Sample 023 | Tiny Fragments(180bp、300bp、522bp) | 2.8130 | 53.0803 | 0.1493 | A |
| Sample 024 | Tiny Fragments(180bp、300bp、523bp) | 2.9380 | 51.4715 | 0.1512 | A |
| Sample 025 | Tiny Fragments(180bp、300bp、524bp) | 1.4340 | 66.6888 | 0.0956 | A |
| Sample 026 | Tiny Fragments(180bp、300bp、525bp) | 2.4330 | 47.3913 | 0.1153 | A |
| Sample 027 | Tiny Fragments(180bp、300bp、526bp) | 11.1610 | 54.2306 | 0.6053 | A |
| Sample 028 | Tiny Fragments(180bp、300bp、527bp) | 1.7590 | 48.7733 | 0.0858 | A |
| Sample 029 | Tiny Fragments(180bp、300bp、528bp) | 8.6250 | 58.1310 | 0.5014 | A |
| Sample 030 | Tiny Fragments(180bp、300bp、529bp) | 7.6230 | 54.6505 | 0.4166 | A |
| Sample 031 | Tiny Fragments(180bp、300bp、530bp) | 4.8520 | 54.5606 | 0.2647 | A |
| Sample 032 | Tiny Fragments(180bp、300bp、531bp) | 13.9970 | 52.6710 | 0.7372 | A |
| Sample 033 | Tiny Fragments(180bp、300bp、532bp) | 8.3460 | 46.2259 | 0.3858 | A |
| Sample 034 | Tiny Fragments(180bp、300bp、533bp) | 8.9100 | 30.1704 | 0.2688 | A |
| Sample 035 | Tiny Fragments(180bp、300bp、534bp) | 3.8260 | 24.8605 | 0.0951 | A |
| Sample 036 | Tiny Fragments(180bp、300bp、535bp) | 6.6810 | 37.2417 | 0.2488 | A |
| Sample 037 | Tiny Fragments(180bp、300bp、536bp) | 1.6050 | 33.9202 | 0.0544 | C |
| Sample 038 | Tiny Fragments(180bp、300bp、537bp) | 4.6320 | 37.7206 | 0.1747 | A |
| Sample 039 | Tiny Fragments(180bp、300bp、538bp) | 3.9770 | 42.7834 | 0.1702 | A |
| Sample 040 | Tiny Fragments(180bp、300bp、539bp) | 1.0450 | 52.1817 | 0.0545 | C |
| Sample 041 | Tiny Fragments(180bp、300bp、540bp) | 1.7080 | 40.1515 | 0.0686 | C |
| Sample 042 | Tiny Fragments(180bp、300bp、541bp) | 1.2710 | 52.5810 | 0.0668 | C |
| Sample 043 | Tiny Fragments(180bp、300bp、542bp) | 2.2280 | 65.4270 | 0.1458 | A |
| Sample 044 | Tiny Fragments(180bp、300bp、543bp) | 13.6940 | 48.4136 | 0.6630 | A |
| Sample 045 | Tiny Fragments(180bp、300bp、544bp) | 4.2170 | 38.4472 | 0.1621 | A |
| Sample 046 | Tiny Fragments(180bp、300bp、545bp) | 1.5690 | 58.3411 | 0.0915 | A |
| Sample 047 | Tiny Fragments(180bp、300bp、546bp) | 2.9400 | 55.9105 | 0.1644 | A |
| Sample 048 | Tiny Fragments(180bp、300bp、547bp) | 2.4950 | 40.9589 | 0.1022 | A |
| Sample 049 | Tiny Fragments(180bp、300bp、548bp) | 4.3460 | 54.9206 | 0.2387 | A |
| Sample 050 | Tiny Fragments(180bp、300bp、549bp) | 7.0960 | 50.1223 | 0.3557 | A |
| Sample 051 | Tiny Fragments(180bp、300bp、550bp) | 3.5230 | 24.8605 | 0.0876 | A |
| Sample 052 | Tiny Fragments(180bp、300bp、551bp) | 14.2430 | 45.2665 | 0.6447 | A |
| Sample 053 | Tiny Fragments(180bp、300bp、552bp) | 4.5960 | 30.2113 | 0.1389 | A |
| Sample 054 | Tiny Fragments(180bp、300bp、553bp) | 5.0430 | 41.8822 | 0.2112 | A |
| Sample 055 | Tiny Fragments(180bp、300bp、554bp) | 4.5480 | 22.4992 | 0.1023 | A |
| Sample 056 | Tiny Fragments(180bp、300bp、555bp) | 3.0010 | 46.4956 | 0.1395 | A |
| Sample 057 | Tiny Fragments(180bp、300bp、556bp) | 2.9410 | 49.9125 | 0.1468 | A |
| Sample 058 | Tiny Fragments(180bp、300bp、557bp) | 4.3920 | 51.5314 | 0.2263 | A |
| Sample 059 | Tiny Fragments(180bp、300bp、558bp) | 3.7660 | 33.9342 | 0.1278 | A |
| Sample 060 | Tiny Fragments(180bp、300bp、559bp) | 6.4200 | 37.8103 | 0.2427 | A |
| Sample 061 | Tiny Fragments(180bp、300bp、560bp) | 1.6520 | 39.9957 | 0.0661 | C |
| Sample 062 | Tiny Fragments(180bp、300bp、561bp) | 1.5370 | 41.7025 | 0.0641 | C |
| Sample 063 | Tiny Fragments(180bp、300bp、562bp) | 2.3950 | 28.9555 | 0.0694 | C |
| Sample 064 | Tiny Fragments(180bp、300bp、563bp) | 5.4660 | 46.5556 | 0.2545 | A |
| Sample 065 | Tiny Fragments(180bp、300bp、564bp) | 1.8540 | 48.6834 | 0.0903 | A |
| Sample 066 | Tiny Fragments(180bp、300bp、565bp) | 2.2100 | 49.7626 | 0.1100 | A |
| Sample 067 | Tiny Fragments(180bp、300bp、566bp) | 1.9440 | 46.3438 | 0.0901 | A |
| Sample 068 | Tiny Fragments(180bp、300bp、567bp) | 2.5390 | 49.1930 | 0.1249 | A |
| Sample 069 | Tiny Fragments(180bp、300bp、568bp) | 16.0610 | 50.2053 | 0.8064 | A |
| Sample 070 | Tiny Fragments(180bp、300bp、569bp) | 4.5160 | 36.6836 | 0.1657 | A |
| Sample 071 | Tiny Fragments(180bp、300bp、570bp) | 3.2460 | 37.7895 | 0.1227 | A |
| Sample 072 | Tiny Fragments(180bp、300bp、571bp) | 1.7540 | 48.5587 | 0.0852 | A |
| Sample 073 | Tiny Fragments(180bp、300bp、572bp) | 12.4580 | 43.3518 | 0.5401 | A |
| Sample 074 | Tiny Fragments(180bp、300bp、573bp) | 4.9710 | 45.4760 | 0.2261 | A |
| Sample 075 | Tiny Fragments(180bp、300bp、574bp) | 3.1920 | 42.0655 | 0.1343 | A |
| Sample 076 | Tiny Fragments(180bp、300bp、575bp) | 3.2990 | 41.7365 | 0.1377 | A |
| Sample 077 | Tiny Fragments(180bp、300bp、576bp) | 7.9400 | 52.2512 | 0.4149 | A |
| Sample 078 | Tiny Fragments(180bp、300bp、577bp) | 9.2340 | 38.7163 | 0.3575 | A |
| Sample 079 | Tiny Fragments(180bp、300bp、578bp) | 1.8870 | 55.3406 | 0.1044 | A |
| Sample 080 | Tiny Fragments(180bp、300bp、579bp) | 3.6470 | 65.7875 | 0.2399 | A |
| Sample 081 | Tiny Fragments(180bp、300bp、580bp) | 8.9590 | 32.2749 | 0.2892 | A |
| Sample 082 | Tiny Fragments(180bp、300bp、581bp) | 2.9100 | 44.2193 | 0.1287 | A |
| Sample 083 | Tiny Fragments(180bp、300bp、582bp) | 5.4530 | 42.2416 | 0.2303 | A |
| Sample 084 | Tiny Fragments(180bp、300bp、583bp) | 11.9680 | 54.7578 | 0.6553 | A |
| Sample 085 | Tiny Fragments(180bp、300bp、584bp) | 1.6850 | 50.2053 | 0.0846 | A |
| Sample 086 | Tiny Fragments(180bp、300bp、585bp) | 1.2290 | 51.8224 | 0.0637 | C |
| Sample 087 | Tiny Fragments(180bp、300bp、586bp) | 8.5010 | 40.5347 | 0.3446 | A |
| Sample 088 | Tiny Fragments(180bp、300bp、587bp) | 10.6750 | 40.8692 | 0.4363 | A |
| Sample 089 | Tiny Fragments(180bp、300bp、588bp) | 20.6830 | 38.8060 | 0.8026 | A |
| Sample 090 | Tiny Fragments(180bp、300bp、589bp) | 7.0130 | 49.0431 | 0.3439 | A |
| Sample 091 | Tiny Fragments(180bp、300bp、590bp) | 3.6700 | 55.6865 | 0.2044 | A |
| Sample 092 | Tiny Fragments(180bp、300bp、591bp) | 5.0990 | 53.3798 | 0.2722 | A |
| Sample 093 | Tiny Fragments(180bp、300bp、592bp) | 15.4900 | 33.5459 | 0.5196 | A |
| Sample 094 | Tiny Fragments(180bp、300bp、593bp) | 7.0350 | 28.4385 | 0.2001 | A |
| Sample 095 | Tiny Fragments(180bp、300bp、594bp) | 2.5830 | 37.7895 | 0.0976 | A |
| Sample 096 | Tiny Fragments(180bp、300bp、595bp) | 6.5460 | 50.9618 | 0.3336 | A |
| Sample 097 | Tiny Fragments(180bp、300bp、596bp) | 5.7980 | 55.0705 | 0.3193 | A |
| Sample 098 | Tiny Fragments(180bp、300bp、597bp) | 10.0200 | 47.1249 | 0.4722 | A |
| Sample 099 | Tiny Fragments(180bp、300bp、598bp) | 14.4920 | 39.3741 | 0.5706 | A |
| Sample 100 | Tiny Fragments(180bp、300bp、599bp) | 1.5180 | 42.9330 | 0.0652 | C |
| Sample 101 | Tiny Fragments(180bp、300bp、600bp) | 7.2270 | 24.9202 | 0.1801 | A |
| Sample 102 | Tiny Fragments(180bp、300bp、601bp) | 2.9950 | 53.2108 | 0.1594 | A |
| Sample 103 | Tiny Fragments(180bp、300bp、602bp) | 1.3270 | 64.3457 | 0.0854 | A |
| Sample 104 | Tiny Fragments(180bp、300bp、603bp) | 5.2870 | 56.1506 | 0.2969 | A |
| Sample 105 | Tiny Fragments(180bp、300bp、604bp) | 25.9740 | 51.3215 | 1.3330 | A |
| Sample 106 | Tiny Fragments(180bp、300bp、605bp) | 1.0100 | 56.5707 | 0.0571 | C |
| Sample 107 | Tiny Fragments(180bp、300bp、606bp) | 0.8310 | 60.3822 | 0.0502 | C |
| Sample 108 | Tiny Fragments(180bp、300bp、607bp) | 11.8260 | 31.0665 | 0.3674 | A |
| Sample 109 | Tiny Fragments(180bp、300bp、608bp) | 1.1210 | 53.0203 | 0.0594 | C |
| Sample 110 | Tiny Fragments(180bp、300bp、609bp) | 2.3720 | 33.5612 | 0.0796 | C |
| Sample 111 | Tiny Fragments(180bp、300bp、610bp) | 1.9300 | 35.5359 | 0.0686 | C |
| Sample 112 | Tiny Fragments(180bp、300bp、611bp) | 12.9920 | 49.0676 | 0.6375 | A |
| Sample 113 | Tiny Fragments(180bp、300bp、612bp) | 4.9110 | 39.4269 | 0.1936 | A |
| Sample 114 | Tiny Fragments(180bp、300bp、613bp) | 9.6210 | 41.1935 | 0.3963 | A |
| Sample 115 | Tiny Fragments(180bp、300bp、614bp) | 2.6530 | 44.3683 | 0.1177 | A |
| Sample 116 | Tiny Fragments(180bp、300bp、615bp) | 5.6810 | 55.7005 | 0.3164 | A |
| Sample 117 | Tiny Fragments(180bp、300bp、616bp) | 23.1160 | 53.4697 | 1.2360 | A |
| Sample 118 | Tiny Fragments(180bp、300bp、617bp) | 1.4830 | 61.4629 | 0.0912 | A |
| Sample 119 | Tiny Fragments(180bp、300bp、618bp) | 2.8330 | 42.9330 | 0.1216 | A |
| Sample 120 | Tiny Fragments(180bp、300bp、619bp) | 1.6930 | 42.5411 | 0.0720 | C |
| Sample 121 | Tiny Fragments(180bp、300bp、620bp) | 1.9840 | 34.9674 | 0.0694 | C |
| Sample 122 | Tiny Fragments(180bp、300bp、621bp) | 12.3610 | 42.1218 | 0.5207 | A |
| Sample 123 | Tiny Fragments(180bp、300bp、622bp) | 3.2140 | 31.6937 | 0.1019 | A |
| Sample 124 | Tiny Fragments(180bp、300bp、623bp) | 3.8260 | 45.2970 | 0.1733 | A |
| Sample 125 | Tiny Fragments(180bp、300bp、624bp) | 3.5570 | 48.4690 | 0.1724 | A |
| Sample 126 | Tiny Fragments(180bp、300bp、625bp) | 2.0790 | 42.3314 | 0.0880 | A |
| Sample 127 | Tiny Fragments(180bp、300bp、626bp) | 1.0320 | 50.7519 | 0.0524 | C |
| Sample 128 | Tiny Fragments(180bp、300bp、627bp) | 5.0990 | 43.0902 | 0.2197 | A |
| Sample 129 | Tiny Fragments(180bp、300bp、628bp) | 1.8330 | 48.2138 | 0.0884 | A |
| Sample 130 | Tiny Fragments(180bp、300bp、629bp) | 6.0500 | 43.3219 | 0.2621 | A |
| Sample 131 | Tiny Fragments(180bp、300bp、630bp) | 2.0980 | 57.5808 | 0.1208 | A |
| Sample 132 | Tiny Fragments(180bp、300bp、631bp) | 2.7400 | 64.9206 | 0.1779 | A |
| Sample 133 | Tiny Fragments(180bp、300bp、632bp) | 2.0270 | 53.4396 | 0.1083 | A |
| Sample 134 | Tiny Fragments(180bp、300bp、633bp) | 1.8690 | 60.6020 | 0.1133 | A |
| Sample 135 | Tiny Fragments(180bp、300bp、634bp) | 1.1610 | 51.6215 | 0.0599 | C |
| Sample 136 | Tiny Fragments(180bp、300bp、635bp) | 5.3040 | 51.5827 | 0.2736 | A |
| Sample 137 | Tiny Fragments(180bp、300bp、636bp) | 1.3250 | 54.8805 | 0.0727 | C |
| Sample 138 | Tiny Fragments(180bp、300bp、637bp) | 3.2620 | 47.1818 | 0.1539 | A |
| Sample 139 | Tiny Fragments(180bp、300bp、638bp) | 4.5570 | 56.5907 | 0.2579 | A |
| Sample 140 | Tiny Fragments(180bp、300bp、639bp) | 4.4730 | 42.7834 | 0.1914 | A |
| Sample 141 | Tiny Fragments(180bp、300bp、640bp) | 8.8460 | 57.2408 | 0.5064 | A |
| Sample 142 | Tiny Fragments(180bp、300bp、641bp) | 6.1930 | 50.8618 | 0.3150 | A |
| Sample 143 | Tiny Fragments(180bp、300bp、642bp) | 7.4850 | 49.9225 | 0.3737 | A |
| Sample 144 | Tiny Fragments(180bp、300bp、643bp) | 3.9970 | 43.6993 | 0.1747 | A |
| Sample 145 | Tiny Fragments(180bp、300bp、644bp) | 13.0920 | 39.2672 | 0.5141 | A |
| Sample 146 | Tiny Fragments(180bp、300bp、645bp) | 2.3890 | 30.5602 | 0.0730 | C |
| Sample 147 | Tiny Fragments(180bp、300bp、646bp) | 2.6640 | 58.9832 | 0.1571 | A |
| Sample 148 | Tiny Fragments(180bp、300bp、647bp) | 10.3130 | 31.6368 | 0.3263 | A |
| Sample 149 | Tiny Fragments(180bp、300bp、648bp) | 3.1440 | 51.0318 | 0.1604 | A |
| Sample 150 | Tiny Fragments(180bp、300bp、649bp) | 3.3810 | 49.1830 | 0.1663 | A |
| Sample 151 | Tiny Fragments(180bp、300bp、650bp) | 5.3620 | 53.3608 | 0.2861 | A |
| Sample 152 | Tiny Fragments(180bp、300bp、651bp) | 6.3750 | 42.7535 | 0.2726 | A |
| Sample 153 | Tiny Fragments(180bp、300bp、652bp) | 1.8290 | 62.4610 | 0.1142 | A |
| Sample 154 | Tiny Fragments(180bp、300bp、653bp) | 1.9780 | 56.9707 | 0.1127 | A |
| Sample 155 | Tiny Fragments(180bp、300bp、654bp) | 5.1810 | 52.5111 | 0.2721 | A |
| Sample 156 | Tiny Fragments(180bp、300bp、655bp) | 1.6090 | 55.9006 | 0.0899 | A |
| Sample 157 | Tiny Fragments(180bp、300bp、656bp) | 3.4350 | 40.7643 | 0.1400 | A |
| Sample 158 | Tiny Fragments(180bp、300bp、657bp) | 6.0960 | 29.8525 | 0.1820 | A |
| Sample 159 | Tiny Fragments(180bp、300bp、658bp) | 1.8600 | 33.0726 | 0.0615 | C |
| Sample 160 | Tiny Fragments(180bp、300bp、659bp) | 9.3670 | 33.2321 | 0.3113 | A |
| Sample 161 | Tiny Fragments(180bp、300bp、660bp) | 1.3870 | 55.5306 | 0.0770 | C |
| Sample 162 | Tiny Fragments(180bp、300bp、661bp) | 0.9350 | 55.6266 | 0.0520 | C |
| Sample 163 | Tiny Fragments(180bp、300bp、662bp) | 1.7270 | 52.1912 | 0.0901 | A |
| Sample 164 | Tiny Fragments(180bp、300bp、663bp) | 4.6590 | 23.2750 | 0.1084 | A |
| Sample 165 | Tiny Fragments(180bp、300bp、664bp) | 2.2440 | 49.9225 | 0.1120 | A |
| Sample 166 | Tiny Fragments(180bp、300bp、665bp) | 8.3350 | 27.7397 | 0.2312 | A |
| Sample 167 | Tiny Fragments(180bp、300bp、666bp) | 5.5650 | 36.7434 | 0.2045 | A |
| Sample 168 | Tiny Fragments(180bp、300bp、667bp) | 7.1430 | 26.9924 | 0.1928 | A |
| Sample 169 | Tiny Fragments(180bp、300bp、668bp) | 3.2620 | 50.2353 | 0.1639 | A |
| Sample 170 | Tiny Fragments(180bp、300bp、669bp) | 1.0720 | 48.3192 | 0.0518 | C |
| Sample 171 | Tiny Fragments(180bp、300bp、670bp) | 2.5100 | 44.0398 | 0.1105 | A |
| Sample 172 | Tiny Fragments(180bp、300bp、671bp) | 1.6720 | 43.4116 | 0.0726 | C |
| Sample 173 | Tiny Fragments(180bp、300bp、672bp) | 1.8580 | 47.9001 | 0.0890 | A |
| Sample 174 | Tiny Fragments(180bp、300bp、673bp) | 1.6480 | 48.2038 | 0.0794 | C |
| Sample 175 | Tiny Fragments(180bp、300bp、674bp) | 2.4230 | 41.0486 | 0.0995 | A |
| Sample 176 | Tiny Fragments(180bp、300bp、675bp) | 1.9120 | 37.2117 | 0.0712 | C |
| Sample 177 | Tiny Fragments(180bp、300bp、676bp) | 4.3620 | 36.8826 | 0.1609 | A |
| Sample 178 | Tiny Fragments(180bp、300bp、677bp) | 3.1140 | 56.0761 | 0.1746 | A |
| Sample 179 | Tiny Fragments(180bp、300bp、678bp) | 9.8890 | 30.3010 | 0.2997 | A |
| Sample 180 | Tiny Fragments(180bp、300bp、679bp) | 3.7080 | 33.1125 | 0.1228 | A |
| Sample 181 | Tiny Fragments(180bp、300bp、680bp) | 2.1610 | 50.8940 | 0.1100 | A |
| Sample 182 | Tiny Fragments(180bp、300bp、681bp) | 1.4670 | 47.8441 | 0.0702 | C |
| Sample 183 | Tiny Fragments(180bp、300bp、682bp) | 1.4000 | 37.0622 | 0.0519 | C |
| Sample 184 | Tiny Fragments(180bp、300bp、683bp) | 1.2090 | 47.2148 | 0.0571 | C |
| Sample 185 | Tiny Fragments(180bp、300bp、684bp) | 2.5240 | 43.2300 | 0.1091 | A |
| Sample 186 | Tiny Fragments(180bp、300bp、685bp) | 2.7400 | 49.9424 | 0.1368 | A |
| Sample 187 | Tiny Fragments(180bp、300bp、686bp) | 4.3460 | 25.0100 | 0.1087 | A |
| Sample 188 | Tiny Fragments(180bp、300bp、687bp) | 3.5130 | 28.4472 | 0.0999 | A |
| Sample 189 | Tiny Fragments(180bp、300bp、688bp) | 1.8700 | 37.2117 | 0.0696 | C |
| Sample 190 | Tiny Fragments(180bp、300bp、689bp) | 3.4730 | 32.0356 | 0.1113 | A |
| Sample 191 | Tiny Fragments(180bp、300bp、690bp) | 3.5210 | 33.4861 | 0.1179 | A |
| Sample 192 | Tiny Fragments(180bp、300bp、691bp) | 5.9510 | 36.8330 | 0.2192 | A |
| Sample 193 | Tiny Fragments(180bp、300bp、692bp) | 6.5170 | 50.0856 | 0.3264 | A |
| Sample 194 | Tiny Fragments(180bp、300bp、693bp) | 20.3000 | 40.6844 | 0.8259 | A |
| Sample 195 | Tiny Fragments(180bp、300bp、694bp) | 6.5420 | 41.5827 | 0.2720 | A |
| Sample 196 | Tiny Fragments(180bp、300bp、695bp) | 24.6270 | 34.6083 | 0.8523 | A |
| Sample 197 | Tiny Fragments(180bp、300bp、696bp) | 2.1260 | 52.6010 | 0.1118 | A |
| Sample 198 | Tiny Fragments(180bp、300bp、697bp) | 5.5720 | 56.0005 | 0.3120 | A |
| Sample 199 | Tiny Fragments(180bp、300bp、698bp) | 1.6860 | 51.2833 | 0.0865 | A |
| Sample 200 | Tiny Fragments(180bp、300bp、699bp) | 5.1690 | 62.0334 | 0.3207 | A |
| Sample 201 | Tiny Fragments(180bp、300bp、700bp) | 6.4340 | 45.3869 | 0.2920 | A |
| Sample 202 | Tiny Fragments(180bp、300bp、701bp) | 6.6200 | 59.8419 | 0.3962 | A |
| Sample 203 | Tiny Fragments(180bp、300bp、702bp) | 0.8650 | 65.8205 | 0.0569 | C |
| Sample 204 | Tiny Fragments(180bp、300bp、703bp) | 2.5080 | 76.6696 | 0.1923 | A |
| Sample 205 | Tiny Fragments(180bp、300bp、704bp) | 3.1760 | 60.8419 | 0.1932 | A |
| Sample 206 | Tiny Fragments(180bp、300bp、705bp) | 1.4820 | 64.2606 | 0.0952 | A |
| Sample 207 | Tiny Fragments(180bp、300bp、706bp) | 2.1840 | 24.6514 | 0.0538 | C |

## *S2.3 Whole Genome Sequencing*

DNA samples qualified by electrophoresis were randomly broken into fragments with a length of about 350bp by Covaris ultrasonic breaker. The finished DNA fragments were treated to prepare the whole library with NEBNext®Ultra™ DNA Library Prep Kit for Illumina (NEB, USA) kit by terminal repair, adding A tail, adding sequencing adapter, purification, PCR amplification, etc. The established library type was a 350bp small fragment library. After the library's construction, Qubit 2.0 was used for preliminary quantification. The library was diluted to 2ng/ul, and then the inserted fragments of the library were detected by Agilent 2100. After the insert size met the expectation, the effective concentration of the library was accurately quantified by Q-PCR to ensure the quality of the library. Then, the Illumina PE150 sequencing platform was used for on-machine sequencing. Please refer to **Nextera® DNA Library Prep Reference Guide** (<https://support.illumina.com.cn/content/dam/illumina-support/documents/documentation/chemistry_documentation/samplepreps_nextera/nexteradna/nextera-dna-library-prep-reference-guide-15027987-01.pdf>) for detailed experimental procedures.

# **Appendix S3 Data analysis**

## *S3.1 Biological information analysis*

### *S3.1.1 Mapping and variant calling reads of Illumina*

The obtained FASTQ file was subject to quality control by FastQC v0.11.9 (<https://www.bioinformatics.babraham.ac.uk/projects/fastqc/>), and the qualified quality control sequences would enter the analysis in the next step. Trimmomatic v0.39 (<http://www.usadellab.org/cms/index.php?page=trimmomatic>) was used to process low-quality fragments. H37Rv (NC_000962.3) was the reference sequence and Snippy v4.6.0 software (<https://github.com/tseemann/snippy>) was used for variant detection, core genome alignment and SNP detection. Snippy-core (a subtool of the snippy software) was used to perform the merging of the SNP files. GATK4 v4.0.4.0 software (<https://gatk.broadinstitute.org>) and Vcftools v0.1.16 software (<http://vcftools.sourceforge.net/>) were used for base quality filtering and group labelling quality filtering. The filtered data was used for the next step in the analysis.

### *S3.1.2 Phylogenetic reconstruction*

At least 95% of SNP positions were aligned after excluding SNPs located in repetitive regions (including PE/PPE-PGRS family genes, insertions, mobile elements or phage sequences) of the genome. IQ-TREE v2.2.2.7 software (<http://www.iqtree.org/>) was used to perform maximum likelihood evolutionary tree construction. ModelFinder Plus (MFP), a sub-command of the IQ-TREE software, was used to select the best-fit model and to perform the best-fit model determination using Bayesian methods. Bootstrap method is 10000 times. The ggtree package of RStudio Desktop software v2022.07.1-554 (<https://www.rstudio.com/products/rstudio/download/>) is used for the beautification of evolutionary trees.

### *S3.1.3 Lineage and antimicrobial resistance prediction*

The TB-Profiler v4.4.2 software (<https://github.com/jodyphelan/TBProfiler>) subcommands lineage and spoligotype are used for lineage identification based on whole gene sequencing, and the subcommand profile is used to predict drug susceptibility.

## *S3.2 Statistical analysis*

Statistical descriptions of categorical information were performed using rates or proportions, while statistical tests were performed using the *χ2*test, corrected *χ2* test, or Fisher's exact test. RStudio Desktop v2022.07.1-554 software (<https://www.rstudio.com/products/rstudio/download/>) was used for the above statistical analyses. In addition, for the Spatial-Temporal scanning analysis, we chose space-time as the type of analysis, the Poisson distribution as the probability model, high or low rates as the scanning region, and SaTScan v10.1 (<https://www.satscan.org/>) as the software used. Test level α = 0.05, the difference was statistically significant when P < 0.05.

# **Appendix S4 Supplement Results(Table):** **Demographic and clinical characteristics**

| **Variables** | | **Count (N = 207)** | **Percentage (%)** |
| --- | --- | --- | --- |
| Sex | |  |  |
|  | Male | 128 | 61.84 |
|  | Female | 79 | 38.16 |
| Age | |  |  |
|  | ＜30 | 35 | 16.91 |
|  | 30-45 | 37 | 17.87 |
|  | 45-60 | 42 | 20.29 |
|  | ≥60 | 93 | 44.93 |
| Occupation | |  |  |
|  | Farmers | 26 | 12.56 |
|  | Others | 181 | 87.44 |
| Residence | |  |  |
|  | Rural | 26 | 12.56 |
|  | Urban | 181 | 87.44 |
| Floating population* | |  |  |
|  | Yes | 50 | 24.15 |
|  | No | 157 | 75.85 |
| Patient delay | |  |  |
|  | Yes | 109 | 52.66 |
|  | No | 98 | 47.34 |
| Triage | |  |  |
|  | Initial treatment | 171 | 82.61 |
|  | Re-treatment | 36 | 17.39 |
| Imageological examination | |  |  |
|  | Normal | 0 | 0.00 |
|  | Abnormal | 207 | 100.00 |
| Sputum smear | |  |  |
|  | Positive | 171 | 82.61 |
|  | Negative | 36 | 17.39 |
| GeneXpert | |  |  |
|  | Positive | 194 | 93.72 |
|  | Negative | 13 | 6.28 |
| Tuberculous meningitis | |  |  |
|  | Yes | 1 | 0.48 |
|  | No | 206 | 99.52 |
| HIV/AIDS (Self-report) | |  |  |
|  | Yes | 5 | 2.42 |
|  | No | 202 | 97.58 |
| Diabetes (Self-report) | |  |  |
|  | Yes | 28 | 13.53 |
|  | No | 179 | 86.47 |
| * Floating population:lived Urumqi more than or equal to 6 months | | | |

# **Appendix S5 Supplement Results(Table): Phenotypic resistance profiles (drug resistance status of 207 drug-resistant tuberculosis strains)**

| **ID** | **Drug** | **Count (N = 207)** | **Percentage (%)** |
| --- | --- | --- | --- |
| 1 | H | 100 | 48.31 |
| 2 | R | 54 | 26.09 |
| 3 | E | 40 | 19.32 |
| 4 | S | 105 | 50.72 |
| 5 | O | 63 | 30.43 |
| 6 | AK | 9 | 4.35 |
| 7 | KM | 8 | 3.86 |
| 8 | CPM | 12 | 5.80 |
| 9 | PAS | 21 | 10.14 |
| 10 | LFX | 55 | 26.57 |
| 11 | MFX | 52 | 25.12 |
| H,R,E,S,O,AK,KM,CPM,PAS,LFX and MFX represent Isoniazid,Rifampicin,  Ethambutol,Streptomycin,Ofloxacin,Amikacin,Kanamycin,Capreomycin,  Para-aminosalicylic-acid,Levofloxacin and Moxifloxacin respectively. | | | |

# **Appendix S6 Supplement Results(Table): Phenotypic resistance profiles (drug resistance spectrum)**

| **ID** | **Drug resistance combination** | **Classification of drug resistance** | **Count (N = 207)** | **Percentage (%)** |
| --- | --- | --- | --- | --- |
| 1 | H | Hr-TB | 14 | 6.76 |
| 2 | R | RR-TB | 6 | 2.90 |
| 3 | E | MR-TB | 8 | 3.86 |
| 4 | S | MR-TB | 43 | 20.77 |
| 5 | O | Other-DR | 6 | 2.90 |
| 6 | KM | Other-DR | 1 | 0.48 |
| 7 | CPM | Other-DR | 2 | 0.97 |
| 8 | PAS | Other-DR | 1 | 0.48 |
| 9 | MFX | Other-DR | 8 | 3.86 |
| 10 | H+R | MDR-TB | 5 | 2.42 |
| 11 | H+E | Hr-TB | 1 | 0.48 |
| 12 | H+S | Hr-TB | 16 | 7.73 |
| 13 | H+PAS | Hr-TB | 1 | 0.48 |
| 14 | R+E | RR-TB | 1 | 0.48 |
| 15 | R+S | RR-TB | 4 | 1.93 |
| 16 | E+S | PR-TB | 2 | 0.97 |
| 17 | O+CPM | Other-DR | 1 | 0.48 |
| 18 | O+PAS | Other-DR | 1 | 0.48 |
| 19 | O+LFX | Other-DR | 2 | 0.97 |
| 20 | O+MFX | Other-DR | 1 | 0.48 |
| 21 | LFX+MFX | Other-DR | 1 | 0.48 |
| 22 | H+R+E | MDR-TB | 3 | 1.45 |
| 23 | H+R+S | MDR-TB | 6 | 2.90 |
| 24 | H+R+PAS | MDR-TB | 1 | 0.48 |
| 25 | H+E+S | Hr-TB | 3 | 1.45 |
| 26 | H+E+MFX | Hr-TB | 1 | 0.48 |
| 27 | H+S+KM | Hr-TB | 1 | 0.48 |
| 28 | H+S+PAS | Hr-TB | 1 | 0.48 |
| 29 | H+O+LFX | Hr-TB | 6 | 2.90 |
| 30 | O+LFX+MFX | Other-DR | 16 | 7.73 |
| 31 | H+R+E+S | MDR-TB | 8 | 3.86 |
| 32 | H+S+O+LFX | Hr-TB | 1 | 0.48 |
| 33 | H+S+O+MFX | Hr-TB | 1 | 0.48 |
| 34 | H+O+LFX+MFX | Hr-TB | 4 | 1.93 |
| 35 | S+O+LFX+MFX | PR-TB | 2 | 0.97 |
| 36 | H+R+E+S+PAS | MDR-TB | 1 | 0.48 |
| 37 | H+R+E+S+MFX | Pre-XDR-TB | 1 | 0.48 |
| 38 | H+R+S+O+MFX | Pre-XDR-TB | 1 | 0.48 |
| 39 | H+R+O+LFX+MFX | Pre-XDR-TB | 3 | 1.45 |
| 40 | H+E+O+PAS+LFX | Hr-TB | 2 | 0.97 |
| 41 | H+S+O+LFX+MFX | Hr-TB | 3 | 1.45 |
| 42 | R+O+PAS+LFX+MFX | Pre-XDR-TB | 1 | 0.48 |
| 43 | H+R+E+O+PAS+LFX | Pre-XDR-TB | 1 | 0.48 |
| 44 | H+R+E+PAS+LFX+MFX | Pre-XDR-TB | 1 | 0.48 |
| 45 | H+E+S+AK+KM+CPM | Hr-TB | 2 | 0.97 |
| 46 | H+E+O+PAS+LFX+MFX | Hr-TB | 1 | 0.48 |
| 47 | H+R+E+S+O+LFX+MFX | Pre-XDR-TB | 1 | 0.48 |
| 48 | H+R+E+O+PAS+LFX+MFX | Pre-XDR-TB | 1 | 0.48 |
| 49 | H+R+S+O+PAS+LFX+MFX | Pre-XDR-TB | 1 | 0.48 |
| 50 | H+R+E+AK+KM+CPM+LFX+MFX | Pre-XDR-TB | 1 | 0.48 |
| 51 | H+R+S+O+AK+CPM+PAS+LFX | Pre-XDR-TB | 3 | 1.45 |
| 52 | H+R+E+S+O+KM+PAS+LFX+MFX | Pre-XDR-TB | 1 | 0.48 |
| 53 | H+R+S+O+AK+CPM+PAS+LFX+MFX | Pre-XDR-TB | 1 | 0.48 |
| 54 | H+R+S+O+AK+KM+CPM+PAS+LFX | Pre-XDR-TB | 1 | 0.48 |
| 55 | H+R+S+O+AK+KM+CPM+PAS+LFX+MFX | Pre-XDR-TB | 1 | 0.48 |
| 1. H,R,E,S,O,AK,KM,CPM,PAS,LFX and MFX represent Isoniazid,Rifampicin,Ethambutol,Streptomycin,  Ofloxacin,Amikacin,Kanamycin,Capreomycin,Para-aminosalicylic-acid,Levofloxacin and Moxifloxacin respectively; | | | | |
|
| 2.Isoniazid-resistant tuberculosis (Hr-TB) is TB that is resistant to isoniazid but sensitive to rifampicin; | | | | |
| 3.Multidrug-resistant tuberculosis (MDR-TB) is defined as resistance to rifampicin and isoniazid; | | | | |
| 4.Mono-resistant tuberculosis (MR-TB) is defined as resistance to one kind of first-line anti-TB drug; | | | | |
| 5.Pre-extensively drug-resistant tuberculosis (Pre-XDR-TB) is TB that is resistant to rifampicin and any fluoroquinolone (a class of second-line anti-TB drug); | | | | |
| 6.Poly-resistant tuberculosis (PR-TB) is TB that is resistant to at last of first-line anti-TB drug (but not include simultaneous resistance to isoniazid and rifampici); | | | | |
| 7.Rifampicin-resistant tuberculosis (RR-TB) is TB that is resistant to rifampicin(No matter what of resistance to other anti-TB drugs); | | | | |
| 8.Extensively drug-resistant tuberculosis (XDR-TB) is TB that is resistant to rifampicin,plus any fluoroquinolone, plus at least one of the drugs bedaquiline and linezolid; | | | | |
| 9.Other-resistant tuberculosis (Other-DR) is defined as resistance combinations that do not fall within the seven definitions above. | | | | |

# **Appendix S7 Supplement Results (Results describe and Table): Molecular resistance characterization**

To investigate the molecular characteristics of DR-TB, we examined the mutational patterns of drug resistance genes in 207 phenotypically drug-resistant MTB strains. A total of 81 strains of MTB were identified to have gene mutations associated with H resistance. The mutation frequencies of the *KatG*, *fabG1*, *inhA*, and *ahpC* genes were 32.85% (68/207), 4.83% (10/207), 2.90% (6/207), and 1.93% (4/207) respectively. Among these mutations, 74 out of 81 strains with H resistance-associated gene mutations exhibited single gene mutations. Notably, the highest mutation rate was observed at the 315 locus of the *KatG* gene (*Ser*315*Thr*). Additionally, 7 out of the 81 strains with H resistance-associated mutations displayed combined mutations, with the highest mutation rate occurring in *inhA* and *katG* (*inhA* c.-154G>A and *katG* p.*Ser*315*Thr*). Another intriguing finding was the presence of a base insertion at loci 1310 to 1331 of the *KatG* gene. Furthermore, among the 207 resistant isolates, 50 strains had mutations in genes associated with R resistance, with *rpoB* and rpoC genes being the main contributors. The mutation rate in the *rpoB* gene was higher than that of the rpoC gene. We found that the *rpoB* gene has co-mutations not only between different loci within the gene, but also with the rpoC gene. Interestin*Gly*, we were not able to detect a separate mutation of the rpoC gene. In terms of mutation rate, the *rpoB* gene is a common resistance gene to R. It has a major mutation locus 450 (*Ser*450*Leu*, with a mutation rate of 7.25%) and a secondary 435 locus (*Asp*435*Val*, with a mutation rate of 3.86%). Mutations in the EMB resistance gene were detected in 27 of the 207 drug-resistant strains of MTB. Similar to rifampicin, only two genes (the embA and *embB* genes) were mutated, and we did not detect a separate *embB* gene variant. Locus 306 is the locus with the highest mutation rate in the *embB* gene (*Met*306*Ile*, with a mutation rate of 4.83%). We also found mutations in three genes (*gid*, *rpsL* and *rrs*) that are associated with resistance to S. We also found that the *rpsL* gene had the highest mutation rate among the *gid*, *rpsL* and *rrs* genes. Locus 43 was the most frequently mutated locus in the *rpsL* gene (*Lys*43*Arg*, with a mutation rate of 25.12%). Furthermore, we found that the *rrs* gene was co-mutated with the *gid* and *rpsL* genes. As for the AK and CPM resistance genes, we only detected the *rrs* gene (a common resistance gene for AK and CPM). In AK and CPM, only the *rrs* gene was mutated, no co-mutations. The genes associated with KM resistance (the eis gene and the *rrs* gene) were mutated and both were single-gene mutations. The 1401 locus of the *rrs* gene had the highest mutation rate in the eis gene and the *rrs* gene (1401A>G, mutation rate is 1.93%). Mutations in PAS genes were found in only 7 of the 207 drug-resistant MTB strains, and the mutated genes included the folC gene and the *thyA* gene. The high mutation rate was found at the 75th locus of the *ThyA* gene (*His*75*Asn*, the mutation rate is 2.09%). Mutations in fluoroquinolone resistance genes were detected in 57 of the 207 drug-resistant MTB strains; the mutated genes were the *gyrA* and *gyrB* genes, and there were combined mutations in the *gyrA* and *gyrB* genes. (See **S7.1**-**S7.2**)

## *S7.1 Molecular drug-resistance characteristics of 207 drug-resistant tuberculosis strains (1)*

| **Drug** | **Type** | **Gene** | **Loci** | **Count (N = 207)** | **Percentage (%)** | **Sort** |
| --- | --- | --- | --- | --- | --- | --- |
| H | Wild type | - | - | 126 | 60.87 | - |
| H | Mutant type | *ahpC* | c.-52C>T | 1 | 0.48 | 4 |
| H | Mutant type | *fabG1* | c.-15C>T | 7 | 3.38 | 2 |
| H | Mutant type | *inhA* | c.-154G>A | 2 | 0.97 | 3 |
| H | Mutant type | *inhA* | p.*Ser*94*Ala* | 1 | 0.48 | 4 |
| H | Mutant type | *katG* | c.-10A>C | 1 | 0.48 | 4 |
| H | Mutant type | *katG* | 1310_1331dupTGTGGCAGGATCCGGTCCCTGC | 1 | 0.48 | 4 |
| H | Mutant type | *katG* | p.*Asn*138*Ser* | 2 | 0.97 | 3 |
| H | Mutant type | *katG* | p.*Ser*315*Asn* | 7 | 3.38 | 2 |
| H | Mutant type | *katG* | p.*Ser*315*Ile* | 1 | 0.48 | 4 |
| H | Mutant type | *katG* | p.*Ser*315*Thr* | 49 | 23.67 | 1 |
| H | Mutant type | *katG* | p.*Thr*308*Pro* | 1 | 0.48 | 4 |
| H | Mutant type | *katG* | p.*Val*1*Leu* | 1 | 0.48 | 4 |
| H | Mutant type | *ahpC* and *fabG1* | *ahpC* c.-48G>A and *fabG1* c.-15C>T | 1 | 0.48 | 4 |
| H | Mutant type | *ahpC* and *katG* | *ahpC* c.-48G>A and *katG* p.Gln461*Pro* | 1 | 0.48 | 4 |
| H | Mutant type | *ahpC* and *katG* | *ahpC* c.-48G>A and *katG* p.*Gly*285*Asp* | 1 | 0.48 | 4 |
| H | Mutant type | *fabG1* and *inhA* | *fabG1* c.-15C>T and *inhA* p.*Ile*21*Thr* | 1 | 0.48 | 4 |
| H | Mutant type | *fabG1* and *katG* | *fabG1* c.-15C>T and *katG* c.-10A>C | 1 | 0.48 | 4 |
| H | Mutant type | *inhA* and *katG* | *inhA* c.-154G>A and *katG* p.*Ser*315*Thr* | 2 | 0.97 | 3 |
| R | Wild type | - | - | 157 | 75.85 | - |
| R | Mutant type | *rpoB* | p.*Asp*435*Tyr* | 1 | 0.48 | 6 |
| R | Mutant type | *rpoB* | p.*Asp*435*Val* | 8 | 3.86 | 2 |
| R | Mutant type | *rpoB* | p.*Gln*432*Glu* | 1 | 0.48 | 6 |
| R | Mutant type | *rpoB* | p.*His*445*Arg* | 1 | 0.48 | 6 |
| R | Mutant type | *rpoB* | p.*His*445*Asp* | 1 | 0.48 | 6 |
| R | Mutant type | *rpoB* | p.*His*445*Leu* | 2 | 0.97 | 5 |
| R | Mutant type | *rpoB* | p.*His*445*Phe* | 1 | 0.48 | 6 |
| R | Mutant type | *rpoB* | p.*His*445*Tyr* | 7 | 3.38 | 3 |
| R | Mutant type | *rpoB* | p.*Leu*430*Pro* | 4 | 1.93 | 4 |
| R | Mutant type | *rpoB* | p.*Leu*452*Pro* | 2 | 0.97 | 5 |
| R | Mutant type | *rpoB* | p.*Ser*441Gln | 2 | 0.97 | 5 |
| R | Mutant type | *rpoB* | p.*Ser*450*Leu* | 15 | 7.25 | 1 |
| R | Mutant type | *rpoB* | p.*His*445*Asn* and p.*Leu*452*Pro* | 1 | 0.48 | 6 |
| R | Mutant type | *rpoB* | p.*His*445*Asn* and p.*Ser*441*Ala* | 1 | 0.48 | 6 |
| R | Mutant type | *rpoB* | p.*His*445Gln and p.*Leu*430*Pro* | 1 | 0.48 | 6 |
| R | Mutant type | *rpoB* and *rpoC* | *rpoB* p.*Ile*491*Phe* and *rpoC* p.*Asp*735*Asn* | 1 | 0.48 | 6 |
| R | Mutant type | *rpoB* and *rpoC* | *rpoB* p.*Ser*450*Leu* and *rpoC* p.*Gly*332*Arg* | 1 | 0.48 | 6 |
| E | Wild type | - | - | 180 | 86.96 | - |
| E | Mutant type | *embB* | p.*Asp*328*Tyr* | 1 | 0.48 | 5 |
| E | Mutant type | *embB* | p.Gln497*Arg* | 2 | 0.97 | 4 |
| E | Mutant type | *embB* | p.*Gly*406*Ala* | 1 | 0.48 | 5 |
| E | Mutant type | *embB* | p.*Gly*406*Ser* | 1 | 0.48 | 5 |
| E | Mutant type | *embB* | p.*Met*306*Ile* | 10 | 4.83 | 1 |
| E | Mutant type | *embB* | p.*Met*306*Val* | 7 | 3.38 | 2 |
| E | Mutant type | *embB* | p.*Asp*1024*Asn* and p.*Gly*406*Asp* | 1 | 0.48 | 5 |
| E | Mutant type | *embA* and *embB* | *embA* c.-12C>T and *embB* p.*Gly*406*Ala* | 4 | 1.93 | 3 |
| S | Wild type | - | - | 127 | 61.35 | - |
| S | Mutant type | *gid* | c.102*delG* | 1 | 0.48 | 4 |
| S | Mutant type | *gid* | c.115delC | 2 | 0.97 | 3 |
| S | Mutant type | *gid* | c.326*delG* | 1 | 0.48 | 4 |
| S | Mutant type | *gid* | c.351*delG* | 1 | 0.48 | 4 |
| S | Mutant type | *rpsL* | p.*Lys*43*Arg* | 52 | 25.12 | 1 |
| S | Mutant type | *rpsL* | p.*Lys*88*Arg* | 9 | 4.35 | 2 |
| S | Mutant type | *rrs* | n.514A>C | 9 | 4.35 | 2 |
| S | Mutant type | *rrs* | n.517C>T | 2 | 0.97 | 3 |
| S | Mutant type | *rrs* | n.799C>T | 1 | 0.48 | 4 |
| S | Mutant type | *gid* and *rrs* | *gid* c.351*delG* and *rrs* n.517C>T | 1 | 0.48 | 4 |
| S | Mutant type | *rpsL* and *rrs* | *rpsL* p.*Lys*43*Arg* and *rrs* n.799C>T | 1 | 0.48 | 4 |
| O | Wild type | - | - | 150 | 72.46 | - |
| O | Mutant type | *gyrA* | p.*Ala*90*Val* | 8 | 3.86 | 4 |
| O | Mutant type | *gyrA* | p.*Asp*94*Ala* | 9 | 4.35 | 3 |
| O | Mutant type | *gyrA* | p.*Asp*94*Asn* | 13 | 6.28 | 2 |
| O | Mutant type | *gyrA* | p.*Asp*94*Gly* | 17 | 8.21 | 1 |
| O | Mutant type | *gyrA* | p.*Asp*94*His* | 2 | 0.97 | 5 |
| O | Mutant type | *gyrA* | p.*Asp*94*Tyr* | 2 | 0.97 | 5 |
| O | Mutant type | *gyrB* | p.*Asp*461*His* | 1 | 0.48 | 6 |
| O | Mutant type | *gyrA* | p.*Asp*89*Asn* and p.*Asp*94*Asn* | 1 | 0.48 | 6 |
| O | Mutant type | *gyrB* | p.*Glu*501*Asp* and p.*Ser*447*Phe* | 2 | 0.97 | 5 |
| O | Mutant type | *gyrA* and *gyrB* | p.*gyrA* *Ala*90*Val* and p.*Asn*499*Thr* | 1 | 0.48 | 6 |
| O | Mutant type | *gyrA* and *gyrB* | p.*gyrA* *Asp*94*Gly* and p.*Asn*499*Lys* | 1 | 0.48 | 6 |
| AK | Wild type | - | - | 201 | 97.10 | - |
| AK | Mutant type | *rrs* | n.1401A>G | 4 | 1.93 | 1 |
| AK | Mutant type | *rrs* | n.1402C>A | 1 | 0.48 | 2 |
| AK | Mutant type | *rrs* | n.1402C>A and n.1484G>T | 1 | 0.48 | 2 |
| KM | Wild type | - | - | 198 | 95.65 | - |
| KM | Mutant type | *eis* | c.-10G>A | 1 | 0.48 | 2 |
| KM | Mutant type | *eis* | c.-12C>T | 1 | 0.48 | 2 |
| KM | Mutant type | *eis* | c.-8C>A | 1 | 0.48 | 2 |
| KM | Mutant type | *rrs* | n.1401A>G | 4 | 1.93 | 1 |
| KM | Mutant type | *rrs* | n.1402C>A | 1 | 0.48 | 2 |
| KM | Mutant type | *rrs* | n.1402C>A and n.1484G>T | 1 | 0.48 | 2 |
| CPM | Wild type | - | - | 201 | 97.10 | - |
| CPM | Mutant type | *rrs* | n.1401A>G | 4 | 1.93 | 1 |
| CPM | Mutant type | *rrs* | n.1402C>A | 1 | 0.48 | 2 |
| CPM | Mutant type | *rrs* | n.1402C>A and n.1484G>T | 1 | 0.48 | 2 |
| PAS | Wild type | - | - | 200 | 96.62 | - |
| PAS | Mutant type | folC | p.*Arg*49*Trp* | 1 | 0.48 | 2 |
| PAS | Mutant type | *thyA* | p.*His*75*Asn* | 6 | 2.90 | 1 |
| LFX | Wild type | - | - | 150 | 72.46 | - |
| LFX | Mutant type | *gyrA* | p.*Ala*90*Val* | 8 | 3.86 | 4 |
| LFX | Mutant type | *gyrA* | p.*Asp*94*Ala* | 9 | 4.35 | 3 |
| LFX | Mutant type | *gyrA* | p.*Asp*94*Asn* | 13 | 6.28 | 2 |
| LFX | Mutant type | *gyrA* | p.*Asp*94*Gly* | 17 | 8.21 | 1 |
| LFX | Mutant type | *gyrA* | p.*Asp*94*His* | 2 | 0.97 | 5 |
| LFX | Mutant type | *gyrA* | p.*Asp*94*Tyr* | 2 | 0.97 | 5 |
| LFX | Mutant type | *gyrB* | p.*Asp*461*His* | 1 | 0.48 | 6 |
| LFX | Mutant type | *gyrA* | p.*Asp*89*Asn* and p.*Asp*94*Asn* | 1 | 0.48 | 6 |
| LFX | Mutant type | *gyrB* | p.*Glu*501*Asp* and p.*Ser*447*Phe* | 2 | 0.97 | 5 |
| LFX | Mutant type | *gyrA* and *gyrB* | p.*gyrA* *Ala*90*Val* and *gyrB* p.*Asn*499*Thr* | 1 | 0.48 | 6 |
| LFX | Mutant type | *gyrA* and *gyrB* | *gyrA* p.*Asp*94*Gly* and *gyrB* p.*Asn*499*Lys* | 1 | 0.48 | 6 |
| MFX | Wild type | - | - | 150 | 72.46 | - |
| MFX | Mutant type | *gyrA* | p.*Ala*90*Val* | 8 | 3.86 | 4 |
| MFX | Mutant type | *gyrA* | p.*Asp*94*Ala* | 9 | 4.35 | 3 |
| MFX | Mutant type | *gyrA* | p.*Asp*94*Asn* | 13 | 6.28 | 2 |
| MFX | Mutant type | *gyrA* | p.*Asp*94*Gly* | 17 | 8.21 | 1 |
| MFX | Mutant type | *gyrA* | p.*Asp*94*His* | 2 | 0.97 | 5 |
| MFX | Mutant type | *gyrA* | p.*Asp*94*Tyr* | 2 | 0.97 | 5 |
| MFX | Mutant type | *gyrB* | p.*Asp*461*His* | 1 | 0.48 | 6 |
| MFX | Mutant type | *gyrA* | p.*Asp*89*Asn* and p.*Asp*94*Asn* | 1 | 0.48 | 6 |
| MFX | Mutant type | *gyrB* | p.*Glu*501*Asp* and p.*Ser*447*Phe* | 2 | 0.97 | 5 |
| MFX | Mutant type | *gyrA* and *gyrB* | *gyrA* p.*Ala*90*Val* and *gyrB* p.*Asn*499*Thr* | 1 | 0.48 | 6 |
| MFX | Mutant type | *gyrA* and *gyrB* | *gyrA* p.*Asp*94*Gly* and *gyrB* p.*Asn*499*Lys* | 1 | 0.48 | 6 |
| H,R,E,S,O,AK,KM,CPM,PAS,LFX and MFX represent Isoniazid,Rifampicin,Ethambutol,Streptomycin,Ofloxacin,Amikacin,  Kanamycin,Capreomycin,Para-aminosalicylic-acid,Levofloxacin and Moxifloxacin respectively; | | | | | | |
|

## *S7.2 Molecular characteristics of 207 drug-resistant tuberculosis strains (2)*

| **ID** | **sub_lineage** | **isoniazid** | **rifampicin** | **ethambutol** | **streptomycin** | **ofloxacin** | **amikacin** | **kanamycin** | **capreomycin** | **para-aminosalicylic_acid** | **levofloxacin** | **moxifloxacin** |
| --- | --- | --- | --- | --- | --- | --- | --- | --- | --- | --- | --- | --- |
| Sample001 | lineage2.2.1 | *katG*_p.*Val*1*Leu* | *rpoB*_p.*Ser*450*Leu* | - | *rpsL*_p.*Lys*43*Arg* | - | - | - | - | - | - | - |
| Sample002 | lineage2.2.1 | - | - | - | - | *gyrA*_p.*Asp*94*Asn* | - | - | - | - | *gyrA*_p.*Asp*94*Asn* | *gyrA*_p.*Asp*94*Asn* |
| Sample003 | lineage2.2.1.1 | - | *rpoB*_p.*His*445*Leu* | - | - | - | - | - | - | - | - | - |
| Sample004 | lineage2.2.1.1 | - | *rpoB*_p.*His*445*Leu* | - | - | - | - | - | - | - | - | - |
| Sample005 | lineage2.2.1 | - | - | - | *rpsL*_p.*Lys*88*Arg* | - | - | - | - | - | - | - |
| Sample006 | lineage2.2.1 | *katG*_p.*Ser*315*Thr* | *rpoB*_p.*Ser*450*Leu* | *embB*_p.*Met*306*Val* | *rpsL*_p.*Lys*43*Arg* | *gyrA*_p.*Asp*94*Tyr* | *rrs*_n.1401A>G | *rrs*_n.1401A>G | *rrs*_n.1401A>G | - | *gyrA*_p.*Asp*94*Tyr* | *gyrA*_p.*Asp*94*Tyr* |
| Sample007 | lineage2.2.1 | - | - | - | - | *gyrB*_p.*Glu*501*Asp*, *gyrB*_p.*Ser*447*Phe* | - | - | - | - | *gyrB*_p.*Glu*501*Asp*, *gyrB*_p.*Ser*447*Phe* | *gyrB*_p.*Glu*501*Asp*, *gyrB*_p.*Ser*447*Phe* |
| Sample008 | lineage2.2.1 | - | - | - | - | *gyrB*_p.*Glu*501*Asp*, *gyrB*_p.*Ser*447*Phe* | - | - | - | - | *gyrB*_p.*Glu*501*Asp*, *gyrB*_p.*Ser*447*Phe* | *gyrB*_p.*Glu*501*Asp*, *gyrB*_p.*Ser*447*Phe* |
| Sample009 | lineage2.2.2 | *katG*_p.*Ser*315*Thr* | *rpoB*_p.*His*445*Tyr* | *embB*_p.*Met*306*Ile* | *rpsL*_p.*Lys*43*Arg* | - | - | - | - | - | - | - |
| Sample010 | lineage2.2.1 | *katG*_p.*Ser*315*Thr* | - | - | *rpsL*_p.*Lys*43*Arg* | - | - | - | - | *thyA*_p.*His*75*Asn* | - | - |
| Sample011 | lineage2.2.1 | - | - | - | *rpsL*_p.*Lys*43*Arg* | - | - | - | - | - | - | - |
| Sample012 | lineage2.2.2 | - | - | - | - | *gyrA*_p.*Asp*94*Ala* | - | - | - | - | *gyrA*_p.*Asp*94*Ala* | *gyrA*_p.*Asp*94*Ala* |
| Sample013 | lineage2.2.1 | *katG*_p.*Ser*315*Thr* | - | - | - | - | - | - | - | - | - | - |
| Sample014 | lineage2.2.1 | - | - | - | - | *gyrA*_p.*Asp*94*Gly* | - | - | - | - | *gyrA*_p.*Asp*94*Gly* | *gyrA*_p.*Asp*94*Gly* |
| Sample015 | lineage4.4.2 | - | - | - | *gid*_c.351*delG*, *rrs*_n.517C>T | *gyrA*_p.*Asp*94*Gly* | - | - | - | - | *gyrA*_p.*Asp*94*Gly* | *gyrA*_p.*Asp*94*Gly* |
| Sample016 | lineage2.2.1 | *katG*_p.*Ser*315*Thr* | - | - | - | *gyrA*_p.*Asp*94*Gly* | - | - | - | - | *gyrA*_p.*Asp*94*Gly* | *gyrA*_p.*Asp*94*Gly* |
| Sample017 | lineage2.2.1 | - | - | - | - | - | - | - | - | - | - | - |
| Sample018 | lineage2.2.1 | - | - | - | - | - | - | - | - | - | - | - |
| Sample019 | lineage2.2.1 | *katG*_p.*Ser*315*Thr* | - | - | - | - | - | - | - | - | - | - |
| Sample020 | lineage2.2.1 | *katG*_p.*Ser*315*Thr* | *rpoB*_p.*Leu*430*Pro* | - | *rrs*_n.514A>C | - | - | - | - | - | - | - |
| Sample021 | lineage2.2.1 | *katG*_p.*Ser*315*Thr* | - | - | *rpsL*_p.*Lys*43*Arg* | - | - | - | - | *thyA*_p.*His*75*Asn* | - | - |
| Sample022 | lineage2.2.1 | *katG*_p.*Ser*315*Thr* | - | - | *rpsL*_p.*Lys*88*Arg* | - | - | - | - | - | - | - |
| Sample023 | lineage4.1.2.1 | - | - | - | - | *gyrA*_p.*Ala*90*Val* | - | - | - | - | *gyrA*_p.*Ala*90*Val* | *gyrA*_p.*Ala*90*Val* |
| Sample024 | lineage2.2.1 | *fabG1*_c.-15C>T | *rpoB*_p.*Ser*450*Leu* | *embB*_p.*Met*306*Ile* | *rpsL*_p.*Lys*43*Arg* | *gyrA*_p.*Asp*94*Gly* | *rrs*_n.1401A>G | *rrs*_n.1401A>G | *rrs*_n.1401A>G | - | *gyrA*_p.*Asp*94*Gly* | *gyrA*_p.*Asp*94*Gly* |
| Sample025 | lineage2.2.1 | - | - | - | *rpsL*_p.*Lys*43*Arg* | - | - | - | - | - | - | - |
| Sample026 | lineage2.2.1 | - | - | - | - | *gyrA*_p.*Ala*90*Val* | - | - | - | - | *gyrA*_p.*Ala*90*Val* | *gyrA*_p.*Ala*90*Val* |
| Sample027 | lineage4.8 | *katG*_p.*Ser*315*Asn* | - | - | *gid*_c.115delC | *gyrA*_p.*Asp*94*Asn* | - | - | - | - | *gyrA*_p.*Asp*94*Asn* | *gyrA*_p.*Asp*94*Asn* |
| Sample028 | lineage2.2.1 | *katG*_p.*Thr*308*Pro* | - | - | *rrs*_n.514A>C | - | - | - | - | - | - | - |
| Sample029 | lineage2.2.1 | - | - | - | - | - | - | - | - | - | - | - |
| Sample030 | lineage4.5 | - | - | - | - | - | - | - | - | - | - | - |
| Sample031 | lineage2.2.1 | *fabG1*_c.-15C>T, *inhA*_p.*Ile*21*Thr* | *rpoB*_p.*Ser*450*Leu* | - | *rrs*_n.517C>T | - | - | - | - | - | - | - |
| Sample032 | lineage2.2.1 | - | - | - | *rrs*_n.514A>C | - | - | - | - | - | - | - |
| Sample033 | lineage2.2.1 | - | - | - | - | - | - | - | - | - | - | - |
| Sample034 | lineage3 | - | - | - | - | - | - | - | - | - | - | - |
| Sample035 | lineage2.2.1 | - | - | - | - | - | - | - | - | - | - | - |
| Sample036 | lineage2.2.1 | - | - | - | - | - | - | - | - | - | - | - |
| Sample037 | lineage2.2.1 | - | - | - | - | - | - | - | - | - | - | - |
| Sample038 | lineage4.5 | *inhA*_c.-154G>A | - | - | - | *gyrA*_p.*Asp*94*Gly* | - | - | - | - | *gyrA*_p.*Asp*94*Gly* | *gyrA*_p.*Asp*94*Gly* |
| Sample039 | lineage2.2.1 | - | - | - | - | - | - | - | - | - | - | - |
| Sample040 | lineage4.8 | *katG*_p.*Ser*315*Thr* | - | - | *gid*_c.115delC | *gyrA*_p.*Asp*94*Asn* | - | - | - | - | *gyrA*_p.*Asp*94*Asn* | *gyrA*_p.*Asp*94*Asn* |
| Sample041 | lineage3 | - | - | - | - | - | - | - | - | - | - | - |
| Sample042 | lineage2.2.1 | - | - | - | *rrs*_n.514A>C | - | - | - | - | - | - | - |
| Sample043 | lineage2.2.1 | - | - | - | - | - | - | - | - | - | - | - |
| Sample044 | lineage3 | - | - | - | - | - | - | - | - | - | - | - |
| Sample045 | lineage2.2.1 | - | - | - | - | - | - | - | - | - | - | - |
| Sample046 | lineage2.2.1 | - | *rpoB*_p.*Leu*452*Pro* | - | - | - | - | - | - | - | - | - |
| Sample047 | lineage2.2.1 | - | - | - | - | - | - | - | - | - | - | - |
| Sample048 | lineage3 | - | - | - | - | - | - | - | - | - | - | - |
| Sample049 | lineage2.2.1 | *katG*_p.*Ser*315*Thr* | *rpoB*_p.*Ser*450*Leu* | *embB*_p.*Asp*1024*Asn*, *embB*_p.*Gly*406*Asp* | *rpsL*_p.*Lys*88*Arg* | - | - | - | - | - | - | - |
| Sample050 | lineage2.2.1 | *katG*_p.*Ser*315*Thr* | *rpoB*_p.*His*445*Tyr* | - | *rpsL*_p.*Lys*43*Arg* | - | - | - | - | - | - | - |
| Sample051 | lineage3 | - | - | - | - | - | - | - | - | - | - | - |
| Sample052 | lineage2.2.1 | - | - | - | *rpsL*_p.*Lys*43*Arg* | - | - | - | - | - | - | - |
| Sample053 | lineage2.2.1 | - | - | - | - | *gyrA*_p.*Asp*94*Gly* | - | - | - | - | *gyrA*_p.*Asp*94*Gly* | *gyrA*_p.*Asp*94*Gly* |
| Sample054 | lineage4.5 | - | - | - | - | - | - | - | - | - | - | - |
| Sample055 | lineage3 | *katG*_p.*Ser*315*Thr* | - | - | - | *gyrA*_p.*Asp*94*Ala* | - | - | - | - | *gyrA*_p.*Asp*94*Ala* | *gyrA*_p.*Asp*94*Ala* |
| Sample056 | lineage4.5 | - | *rpoB*_p.*His*445*Asn*, *rpoB*_p.*Ser*441*Ala* | - | - | - | *rrs*_n.1402C>A, *rrs*_n.1484G>T | *rrs*_n.1402C>A, *rrs*_n.1484G>T | *rrs*_n.1402C>A, *rrs*_n.1484G>T | - | - | - |
| Sample057 | lineage2.2.1 | - | - | - | - | - | - | - | - | - | - | - |
| Sample058 | lineage4.5 | - | - | - | - | - | - | - | - | - | - | - |
| Sample059 | lineage2.2.1 | - | - | - | - | - | - | - | - | - | - | - |
| Sample060 | lineage2.2.1 | - | *rpoB*_p.*Ser*450*Leu* | - | *rpsL*_p.*Lys*43*Arg* | - | - | - | - | - | - | - |
| Sample061 | lineage3.1.3 | - | - | - | - | - | - | - | - | - | - | - |
| Sample062 | lineage4.5 | - | - | - | - | - | - | - | - | - | - | - |
| Sample063 | lineage4.8 | - | - | - | - | - | - | - | - | - | - | - |
| Sample064 | lineage2.2.1 | - | - | - | - | - | - | - | - | - | - | - |
| Sample065 | lineage2.2.1 | *katG*_c.1310_1331dupTGTGGCAGGATCCGGTCCCTGC | *rpoB*_p.*Ser*450*Leu* | - | - | *gyrA*_p.*Asp*94*Gly* | - | - | - | - | *gyrA*_p.*Asp*94*Gly* | *gyrA*_p.*Asp*94*Gly* |
| Sample066 | lineage3 | - | - | - | - | - | - | - | - | - | - | - |
| Sample067 | lineage3 | *katG*_p.*Ser*315*Thr* | - | - | *rpsL*_p.*Lys*43*Arg* | - | - | - | - | - | - | - |
| Sample068 | lineage2.2.1 | - | *rpoB*_p.*Leu*452*Pro* | - | - | - | - | - | - | - | - | - |
| Sample069 | lineage2.2.1 | *katG*_p.*Ser*315*Asn* | *rpoB*_p.*His*445*Tyr* | - | - | - | - | - | - | - | - | - |
| Sample070 | lineage3 | - | - | - | - | - | - | - | - | - | - | - |
| Sample071 | lineage2.2.2 | - | - | - | *rpsL*_p.*Lys*43*Arg* | - | - | - | - | - | - | - |
| Sample072 | lineage2.2.1 | *katG*_p.*Ser*315*Thr* | - | - | *rpsL*_p.*Lys*43*Arg* | - | - | - | - | - | - | - |
| Sample073 | lineage2.2.1 | - | - | - | *rpsL*_p.*Lys*43*Arg* | - | - | - | - | - | - | - |
| Sample074 | lineage2.2.1 | *katG*_p.*Ser*315*Thr* | *rpoB*_p.*His*445*Asp* | *embB*_p.*Met*306*Val* | *rrs*_n.514A>C | - | - | - | - | *thyA*_p.*His*75*Asn* | - | - |
| Sample075 | lineage3 | *katG*_p.*Ser*315*Thr* | - | - | *rpsL*_p.*Lys*43*Arg* | - | - | - | - | - | - | - |
| Sample076 | lineage2.2.1 | - | - | - | - | - | - | - | - | - | - | - |
| Sample077 | lineage2.2.2 | - | - | - | - | *gyrA*_p.*Ala*90*Val* | - | - | - | - | *gyrA*_p.*Ala*90*Val* | *gyrA*_p.*Ala*90*Val* |
| Sample078 | lineage2.2.2 | *fabG1*_c.-15C>T | - | - | - | - | - | - | - | - | - | - |
| Sample079 | lineage2.2.2 | - | - | - | *rpsL*_p.*Lys*43*Arg* | - | - | - | - | - | - | - |
| Sample080 | lineage2.2.1 | *katG*_p.*Ser*315*Thr* | - | - | - | - | - | - | - | - | - | - |
| Sample081 | lineage2.2.1 | *inhA*_p.*Ser*94*Ala* | - | - | - | - | - | - | - | - | - | - |
| Sample082 | lineage4.5 | - | - | - | - | - | - | - | - | - | - | - |
| Sample083 | lineage3 | - | - | - | - | - | - | - | - | - | - | - |
| Sample084 | lineage2.2.1 | - | - | - | *rpsL*_p.*Lys*43*Arg* | - | - | - | - | - | - | - |
| Sample085 | lineage2.2.1 | *ahpC*_c.-52C>T | - | - | - | - | - | - | - | - | - | - |
| Sample086 | lineage2.2.1 | - | - | - | - | - | - | - | - | - | - | - |
| Sample087 | lineage2.2.1 | *katG*_p.*Ser*315*Asn* | *rpoB*_p.*Ser*450*Leu* | *embB*_p.Gln497*Arg* | *rpsL*_p.*Lys*43*Arg* | *gyrA*_p.*Ala*90*Val* | - | eis_c.-12C>T | - | - | *gyrA*_p.*Ala*90*Val* | *gyrA*_p.*Ala*90*Val* |
| Sample088 | lineage2.2.1 | *katG*_p.*Ser*315*Asn* | - | - | *rpsL*_p.*Lys*43*Arg* | - | - | - | - | *thyA*_p.*His*75*Asn* | - | - |
| Sample089 | lineage2.2.1 | - | - | - | *rpsL*_p.*Lys*43*Arg* | *gyrA*_p.*Ala*90*Val* | - | - | - | - | *gyrA*_p.*Ala*90*Val* | *gyrA*_p.*Ala*90*Val* |
| Sample090 | lineage2.2.1.1 | - | - | - | *rrs*_n.514A>C | - | - | - | - | - | - | - |
| Sample091 | lineage4.5 | - | - | - | - | - | - | - | - | - | - | - |
| Sample092 | lineage2.2.1.2 | - | - | - | - | - | - | - | - | - | - | - |
| Sample093 | lineage3 | - | - | - | - | - | - | - | - | - | - | - |
| Sample094 | lineage2.2.1.1 | *katG*_p.*Ser*315*Thr* | - | - | *rpsL*_p.*Lys*43*Arg* | - | - | - | - | - | - | - |
| Sample095 | lineage2.2.1 | *katG*_p.*Ser*315*Thr* | - | - | *rpsL*_p.*Lys*43*Arg* | - | *rrs*_n.1401A>G | *rrs*_n.1401A>G | *rrs*_n.1401A>G | - | - | - |
| Sample096 | lineage3 | - | - | - | - | - | - | - | - | - | - | - |
| Sample097 | lineage2.2.1 | - | - | - | - | - | - | - | - | - | - | - |
| Sample098 | lineage2.2.1 | *katG*_p.*Ser*315*Thr* | - | - | *rpsL*_p.*Lys*43*Arg* | - | - | eis_c.-10G>A | - | - | - | - |
| Sample099 | lineage4.2.2 | *katG*_p.*Ser*315*Thr* | - | - | - | - | - | - | - | - | - | - |
| Sample100 | lineage2.2.1 | - | - | - | *rpsL*_p.*Lys*43*Arg* | - | - | - | - | - | - | - |
| Sample101 | lineage3 | - | - | - | - | - | - | - | - | - | - | - |
| Sample102 | lineage2.2.1 | - | - | - | *rpsL*_p.*Lys*43*Arg* | - | - | - | - | - | - | - |
| Sample103 | lineage2.2.1 | - | - | - | *rpsL*_p.*Lys*43*Arg* | - | - | - | - | - | - | - |
| Sample104 | lineage2.2.1 | - | - | - | *rpsL*_p.*Lys*43*Arg* | - | - | - | - | - | - | - |
| Sample105 | lineage2.2.2 | - | - | - | - | - | - | - | - | - | - | - |
| Sample106 | lineage4.5 | *fabG1*_c.-15C>T | - | - | *gid*_c.102*delG* | *gyrA*_p.*Asp*89*Asn*, *gyrA*_p.*Asp*94*Asn* | - | - | - | - | *gyrA*_p.*Asp*89*Asn*, *gyrA*_p.*Asp*94*Asn* | *gyrA*_p.*Asp*89*Asn*, *gyrA*_p.*Asp*94*Asn* |
| Sample107 | lineage2.2.1 | - | - | - | - | - | - | - | - | - | - | - |
| Sample108 | lineage2.2.1 | - | *rpoB*_p.*His*445*Tyr* | - | - | *gyrA*_p.*Asp*94*Gly* | - | - | - | - | *gyrA*_p.*Asp*94*Gly* | *gyrA*_p.*Asp*94*Gly* |
| Sample109 | lineage2.2.1 | - | - | - | *rpsL*_p.*Lys*43*Arg* | - | - | - | - | - | - | - |
| Sample110 | lineage3 | - | - | - | - | - | - | - | - | - | - | - |
| Sample111 | lineage2.2.1 | *katG*_p.*Ser*315*Thr* | *rpoB*_p.*Ser*450*Leu* | *embB*_p.*Met*306*Val* | *rpsL*_p.*Lys*43*Arg* | *gyrA*_p.*Asp*94*Asn* | *rrs*_n.1401A>G | *rrs*_n.1401A>G | *rrs*_n.1401A>G | - | *gyrA*_p.*Asp*94*Asn* | *gyrA*_p.*Asp*94*Asn* |
| Sample112 | lineage2.2.1 | *katG*_p.*Ser*315*Thr* | *rpoB*_p.*Asp*435*Val* | - | *rpsL*_p.*Lys*43*Arg* | *gyrA*_p.*Asp*94*Gly* | - | - | - | folC_p.*Arg*49*Trp* | *gyrA*_p.*Asp*94*Gly* | *gyrA*_p.*Asp*94*Gly* |
| Sample113 | lineage2.2.2 | *katG*_p.*Ser*315*Thr* | - | - | *gid*_c.326*delG* | - | - | - | - | - | - | - |
| Sample114 | lineage4.5 | - | - | - | - | - | - | - | - | - | - | - |
| Sample115 | lineage4.5 | *inhA*_c.-154G>A | *rpoB*_p.*Asp*435*Tyr* | *embB*_p.*Gly*406*Ser* | - | - | - | - | - | - | - | - |
| Sample116 | lineage2.2.1 | - | - | - | *rpsL*_p.*Lys*43*Arg* | - | - | - | - | - | - | - |
| Sample117 | lineage2.2.1 | *katG*_p.*Ser*315*Thr* | - | - | - | - | - | - | - | - | - | - |
| Sample118 | lineage2.2.1 | - | - | - | - | *gyrA*_p.*Asp*94*His* | - | - | - | - | *gyrA*_p.*Asp*94*His* | *gyrA*_p.*Asp*94*His* |
| Sample119 | lineage2.2.1 | - | - | - | *rpsL*_p.*Lys*43*Arg* | - | - | - | - | *thyA*_p.*His*75*Asn* | - | - |
| Sample120 | lineage2.2.1 | *katG*_p.*Ser*315*Thr* | - | - | *rpsL*_p.*Lys*43*Arg* | - | - | - | - | - | - | - |
| Sample121 | lineage4.5 | - | - | - | *rpsL*_p.*Lys*88*Arg* | - | - | - | - | - | - | - |
| Sample122 | lineage2.2.1 | *katG*_p.*Ser*315*Asn* | *rpoB*_p.*His*445*Phe* | - | - | - | - | - | - | - | - | - |
| Sample123 | lineage2.2.1 | - | - | - | *rpsL*_p.*Lys*43*Arg* | - | - | - | - | - | - | - |
| Sample124 | lineage2.2.1 | - | - | - | - | - | - | - | - | - | - | - |
| Sample125 | lineage2.2.1 | - | - | - | - | - | - | - | - | - | - | - |
| Sample126 | lineage4.5 | *katG*_p.*Ser*315*Thr* | *rpoB*_p.*Ile*491*Phe*, rpoC_p.*Asp*735*Asn* | - | - | - | - | - | - | - | - | - |
| Sample127 | lineage2.2.1 | - | - | - | *rpsL*_p.*Lys*43*Arg* | - | - | - | - | - | - | - |
| Sample128 | lineage2.2.1 | *katG*_p.*Ser*315*Ile* | - | *embB*_p.*Gly*406*Ala* | - | *gyrA*_p.*Ala*90*Val* | - | - | - | - | *gyrA*_p.*Ala*90*Val* | *gyrA*_p.*Ala*90*Val* |
| Sample129 | lineage3 | *fabG1*_c.-15C>T | - | - | *rrs*_n.514A>C | - | - | - | - | - | - | - |
| Sample130 | lineage2.2.1.2 | - | - | - | - | - | - | - | - | - | - | - |
| Sample131 | lineage2.2.1 | - | - | - | - | - | - | - | - | - | - | - |
| Sample132 | lineage3 | - | - | - | - | - | - | - | - | - | - | - |
| Sample133 | lineage2.2.1 | - | - | - | - | - | - | - | - | - | - | - |
| Sample134 | lineage3 | - | - | - | - | - | - | - | - | - | - | - |
| Sample135 | lineage2.2.1 | - | - | - | - | - | - | - | - | - | - | - |
| Sample136 | lineage2.2.1 | - | - | - | *rpsL*_p.*Lys*43*Arg* | - | - | - | - | - | - | - |
| Sample137 | lineage2.2.1 | - | - | - | - | *gyrA*_p.*Ala*90*Val* | - | - | - | - | *gyrA*_p.*Ala*90*Val* | *gyrA*_p.*Ala*90*Val* |
| Sample138 | lineage2.2.1 | *katG*_p.*Ser*315*Thr* | *rpoB*_p.*His*445Gln, *rpoB*_p.*Leu*430*Pro* | *embB*_p.*Asp*328*Tyr* | *rrs*_n.514A>C | - | - | - | - | - | - | - |
| Sample139 | lineage2.2.1 | - | - | - | - | - | - | - | - | - | - | - |
| Sample140 | lineage4.3.4.2 | - | - | - | - | *gyrB*_p.*Asp*461*His* | - | - | - | - | *gyrB*_p.*Asp*461*His* | *gyrB*_p.*Asp*461*His* |
| Sample141 | lineage2.2.1 | *katG*_p.*Ser*315*Thr* | - | - | *rpsL*_p.*Lys*43*Arg* | - | - | - | - | - | - | - |
| Sample142 | lineage4.5 | *fabG1*_c.-15C>T | - | - | - | *gyrA*_p.*Asp*94*Gly* | - | - | - | - | *gyrA*_p.*Asp*94*Gly* | *gyrA*_p.*Asp*94*Gly* |
| Sample143 | lineage2.2.1 | *katG*_p.*Ser*315*Thr* | *rpoB*_p.*His*445*Tyr* | embA_c.-12C>T, *embB*_p.*Gly*406*Ala* | *rpsL*_p.*Lys*43*Arg* | - | - | - | - | - | - | - |
| Sample144 | lineage4.4.2 | - | - | - | - | *gyrA*_p.*Asp*94*Gly* | - | - | - | - | *gyrA*_p.*Asp*94*Gly* | *gyrA*_p.*Asp*94*Gly* |
| Sample145 | lineage2.2.1 | - | - | - | - | *gyrA*_p.*Asp*94*Gly* | - | - | - | - | *gyrA*_p.*Asp*94*Gly* | *gyrA*_p.*Asp*94*Gly* |
| Sample146 | lineage2.2.1 | *katG*_p.*Ser*315*Thr* | - | - | *rpsL*_p.*Lys*43*Arg* | - | - | - | - | - | - | - |
| Sample147 | lineage2.2.1 | - | - | - | *rpsL*_p.*Lys*43*Arg* | - | - | - | - | - | - | - |
| Sample148 | lineage2.2.1 | - | - | - | - | - | - | - | - | - | - | - |
| Sample149 | lineage2.2.1 | *katG*_p.*Ser*315*Thr* | *rpoB*_p.*Ser*450*Leu*, rpoC_p.*Gly*332*Arg* | *embB*_p.*Met*306*Val* | *rpsL*_p.*Lys*43*Arg* | *gyrA*_p.*Asp*94*Asn* | - | eis_c.-8C>A | - | - | *gyrA*_p.*Asp*94*Asn* | *gyrA*_p.*Asp*94*Asn* |
| Sample150 | lineage2.2.1 | - | - | - | *rpsL*_p.*Lys*43*Arg* | *gyrA*_p.*Asp*94*Asn* | - | - | - | - | *gyrA*_p.*Asp*94*Asn* | *gyrA*_p.*Asp*94*Asn* |
| Sample151 | lineage2.2.1 | - | *rpoB*_p.Gln432*Glu* | *embB*_p.*Met*306*Val* | *rpsL*_p.*Lys*43*Arg* | *gyrA*_p.*Asp*94*His* | - | - | - | - | *gyrA*_p.*Asp*94*His* | *gyrA*_p.*Asp*94*His* |
| Sample152 | lineage2.2.1 | - | - | - | - | - | - | - | - | - | - | - |
| Sample153 | lineage2.2.1 | *fabG1*_c.-15C>T | - | - | - | - | - | - | - | - | - | - |
| Sample154 | lineage2.2.1 | - | - | - | - | *gyrA*_p.*Asp*94*Ala* | - | - | - | - | *gyrA*_p.*Asp*94*Ala* | *gyrA*_p.*Asp*94*Ala* |
| Sample155 | lineage2.2.1 | - | - | - | - | *gyrA*_p.*Asp*94*Ala* | - | - | - | - | *gyrA*_p.*Asp*94*Ala* | *gyrA*_p.*Asp*94*Ala* |
| Sample156 | lineage4.5 | *ahpC*_c.-48G>A, *katG*_p.Gln461*Pro* | - | - | *rpsL*_p.*Lys*43*Arg* | - | - | - | - | - | - | - |
| Sample157 | lineage2.2.1 | - | - | - | - | - | - | - | - | - | - | - |
| Sample158 | lineage2.2.1 | - | - | - | - | *gyrA*_p.*Asp*94*Ala* | - | - | - | - | *gyrA*_p.*Asp*94*Ala* | *gyrA*_p.*Asp*94*Ala* |
| Sample159 | lineage2.2.1 | - | - | - | - | *gyrA*_p.*Asp*94*Gly*, *gyrB*_p.*Asn*499*Lys* | - | - | - | - | *gyrA*_p.*Asp*94*Gly*, *gyrB*_p.*Asn*499*Lys* | *gyrA*_p.*Asp*94*Gly*, *gyrB*_p.*Asn*499*Lys* |
| Sample160 | lineage2.2.1 | - | - | - | *rpsL*_p.*Lys*43*Arg* | - | - | - | - | - | - | - |
| Sample161 | lineage2.2.1 | - | - | - | *rrs*_n.799C>T | - | - | - | - | - | - | - |
| Sample162 | lineage2.2.1 | - | - | - | - | *gyrA*_p.*Asp*94*Ala* | - | - | - | - | *gyrA*_p.*Asp*94*Ala* | *gyrA*_p.*Asp*94*Ala* |
| Sample163 | lineage2.2.1 | *katG*_p.*Asn*138*Ser* | *rpoB*_p.*Leu*430*Pro* | - | - | - | - | - | - | - | - | - |
| Sample164 | lineage2.2.1 | *katG*_p.*Ser*315*Thr* | *rpoB*_p.*Ser*450*Leu* | - | *rpsL*_p.*Lys*43*Arg*, *rrs*_n.799C>T | - | *rrs*_n.1402C>A | *rrs*_n.1402C>A | *rrs*_n.1402C>A | - | - | - |
| Sample165 | lineage2.2.1 | - | - | - | - | - | - | - | - | - | - | - |
| Sample166 | lineage2.2.1 | - | - | - | - | - | - | - | - | - | - | - |
| Sample167 | lineage2.2.1 | - | - | - | - | *gyrA*_p.*Asp*94*Ala* | - | - | - | - | *gyrA*_p.*Asp*94*Ala* | *gyrA*_p.*Asp*94*Ala* |
| Sample168 | lineage2.2.1 | *katG*_p.*Asn*138*Ser* | *rpoB*_p.*Leu*430*Pro* | *embB*_p.*Met*306*Val* | - | - | - | - | - | - | - | - |
| Sample169 | lineage2.2.1 | - | - | - | - | *gyrA*_p.*Ala*90*Val* | - | - | - | - | *gyrA*_p.*Ala*90*Val* | *gyrA*_p.*Ala*90*Val* |
| Sample170 | lineage2.2.1 | *katG*_p.*Ser*315*Thr* | - | - | *rpsL*_p.*Lys*88*Arg* | *gyrA*_p.*Asp*94*Gly* | - | - | - | - | *gyrA*_p.*Asp*94*Gly* | *gyrA*_p.*Asp*94*Gly* |
| Sample171 | lineage2.2.2 | *katG*_p.*Ser*315*Thr* | *rpoB*_p.*Asp*435*Val* | *embB*_p.*Met*306*Ile* | - | *gyrA*_p.*Asp*94*Asn* | - | - | - | - | *gyrA*_p.*Asp*94*Asn* | *gyrA*_p.*Asp*94*Asn* |
| Sample172 | lineage2.2.2 | *katG*_p.*Ser*315*Thr* | *rpoB*_p.*Asp*435*Val* | *embB*_p.*Met*306*Ile* | - | *gyrA*_p.*Asp*94*Asn* | - | - | - | - | *gyrA*_p.*Asp*94*Asn* | *gyrA*_p.*Asp*94*Asn* |
| Sample173 | lineage2.2.1 | *katG*_p.*Ser*315*Thr* | *rpoB*_p.*Ser*450*Leu* | embA_c.-12C>T | *rpsL*_p.*Lys*43*Arg* | *gyrA*_p.*Asp*94*Ala* | - | - | - | - | *gyrA*_p.*Asp*94*Ala* | *gyrA*_p.*Asp*94*Ala* |
| Sample174 | lineage2.2.1 | *ahpC*_c.-48G>A, *fabG1*_c.-15C>T | - | - | *rrs*_n.514A>C | - | - | - | - | - | - | - |
| Sample175 | lineage4.3.3 | - | - | - | - | - | - | - | - | - | - | - |
| Sample176 | lineage4.2.1.1 | *inhA*_c.-154G>A, *katG*_p.*Ser*315*Thr* | *rpoB*_p.*Ser*450*Leu* | embA_c.-12C>T, *embB*_p.*Met*306*Ile* | - | - | - | - | - | - | - | - |
| Sample177 | lineage2.2.2 | *katG*_p.*Ser*315*Thr* | *rpoB*_p.*Asp*435*Val* | *embB*_p.*Met*306*Ile* | - | *gyrA*_p.*Asp*94*Asn* | - | - | - | - | *gyrA*_p.*Asp*94*Asn* | *gyrA*_p.*Asp*94*Asn* |
| Sample178 | lineage4.2.1.1 | *inhA*_c.-154G>A, *katG*_p.*Ser*315*Thr* | *rpoB*_p.*Ser*450*Leu* | embA_c.-12C>T, *embB*_p.*Met*306*Ile* | - | - | - | - | - | - | - | - |
| Sample179 | lineage2.2.1.2 | *katG*_p.*Ser*315*Asn* | *rpoB*_p.*Ser*441Gln | - | - | *gyrA*_p.*Asp*94*Gly* | - | - | - | - | *gyrA*_p.*Asp*94*Gly* | *gyrA*_p.*Asp*94*Gly* |
| Sample180 | lineage4.5 | *katG*_p.*Ser*315*Thr* | *rpoB*_p.*Asp*435*Val* | *embB*_p.*Met*306*Ile* | - | *gyrA*_p.*Asp*94*Asn* | - | - | - | - | *gyrA*_p.*Asp*94*Asn* | *gyrA*_p.*Asp*94*Asn* |
| Sample181 | lineage2.2.2 | *katG*_p.*Ser*315*Thr* | *rpoB*_p.*Asp*435*Val* | *embB*_p.*Met*306*Ile* | - | *gyrA*_p.*Asp*94*Asn* | - | - | - | - | *gyrA*_p.*Asp*94*Asn* | *gyrA*_p.*Asp*94*Asn* |
| Sample182 | lineage2.2.1 | - | *rpoB*_p.*His*445*Arg* | - | *rpsL*_p.*Lys*88*Arg* | - | - | - | - | - | - | - |
| Sample183 | lineage2.2.2 | *katG*_p.*Ser*315*Thr* | *rpoB*_p.*Asp*435*Val* | *embB*_p.*Met*306*Ile* | - | *gyrA*_p.*Asp*94*Asn* | - | - | - | - | *gyrA*_p.*Asp*94*Asn* | *gyrA*_p.*Asp*94*Asn* |
| Sample184 | lineage4.5 | *fabG1*_c.-15C>T | - | - | - | - | - | - | - | - | - | - |
| Sample185 | lineage2.2.1 | *katG*_p.*Ser*315*Thr* | *rpoB*_p.*His*445*Asn*, *rpoB*_p.*Leu*452*Pro* | - | *rpsL*_p.*Lys*88*Arg* | - | - | - | - | - | - | - |
| Sample186 | lineage2.2.1 | *ahpC*_c.-48G>A, *katG*_p.*Gly*285*Asp* | - | - | - | - | - | - | - | - | - | - |
| Sample187 | lineage2.2.2 | *katG*_p.*Ser*315*Thr* | - | *embB*_p.*Met*306*Ile* | *rpsL*_p.*Lys*43*Arg* | - | - | - | - | - | - | - |
| Sample188 | lineage2.2.1 | - | - | - | - | - | - | - | - | - | - | - |
| Sample189 | lineage2.2.1 | *katG*_p.*Ser*315*Thr* | - | - | *rrs*_n.517C>T | - | - | - | - | - | - | - |
| Sample190 | lineage2.2.1 | *fabG1*_c.-15C>T, *katG*_c.-10A>C | *rpoB*_p.*Leu*430*Pro* | - | *rpsL*_p.*Lys*43*Arg* | - | - | - | - | - | - | - |
| Sample191 | lineage2.2.1 | - | - | - | - | *gyrA*_p.*Asp*94*Tyr* | - | - | - | - | *gyrA*_p.*Asp*94*Tyr* | *gyrA*_p.*Asp*94*Tyr* |
| Sample192 | lineage2.2.1 | *katG*_c.-10A>C | *rpoB*_p.*His*445*Tyr* | - | *rpsL*_p.*Lys*43*Arg* | - | - | - | - | - | - | - |
| Sample193 | lineage2.2.1 | - | - | - | - | - | - | - | - | *thyA*_p.*His*75*Asn* | - | - |
| Sample194 | lineage2.2.2;lineage2.2.1 | *katG*_p.*Ser*315*Thr* | *rpoB*_p.*Asp*435*Val* | *embB*_p.*Met*306*Ile* | - | *gyrA*_p.*Asp*94*Asn* | - | - | - | - | *gyrA*_p.*Asp*94*Asn* | *gyrA*_p.*Asp*94*Asn* |
| Sample195 | lineage2.2.1.2 | *katG*_p.*Ser*315*Asn* | *rpoB*_p.*Ser*441Gln | - | - | *gyrA*_p.*Asp*94*Gly* | - | - | - | - | *gyrA*_p.*Asp*94*Gly* | *gyrA*_p.*Asp*94*Gly* |
| Sample196 | lineage2.2.1 | *katG*_p.*Ser*315*Thr* | *rpoB*_p.*His*445*Tyr* | *embB*_p.Gln497*Arg* | *rpsL*_p.*Lys*43*Arg* | - | - | - | - | - | - | - |
| Sample197 | lineage2.2.1 | *katG*_p.*Ser*315*Thr* | *rpoB*_p.*Ser*450*Leu* | *embB*_p.*Met*306*Val* | *rpsL*_p.*Lys*88*Arg* | - | - | - | - | - | - | - |
| Sample198 | lineage2.2.1 | - | - | - | - | *gyrA*_p.*Asp*94*Ala* | - | - | - | - | *gyrA*_p.*Asp*94*Ala* | *gyrA*_p.*Asp*94*Ala* |
| Sample199 | lineage4.4.2 | - | - | - | *gid*_c.351*delG* | - | - | - | - | - | - | - |
| Sample200 | lineage2.2.1 | - | - | - | *rpsL*_p.*Lys*88*Arg* | - | - | - | - | - | - | - |
| Sample201 | lineage3 | *katG*_p.*Ser*315*Thr* | *rpoB*_p.*Ser*450*Leu* | - | - | - | - | - | - | - | - | - |
| Sample202 | lineage2.2.1 | - | - | - | - | - | - | - | - | - | - | - |
| Sample203 | lineage2.2.1 | - | - | - | - | *gyrA*_p.*Ala*90*Val*, *gyrB*_p.*Asn*499*Thr* | - | - | - | - | *gyrA*_p.*Ala*90*Val*, *gyrB*_p.*Asn*499*Thr* | *gyrA*_p.*Ala*90*Val*, *gyrB*_p.*Asn*499*Thr* |
| Sample204 | lineage2.2.1 | - | - | - | - | *gyrA*_p.*Asp*94*Gly* | - | - | - | - | *gyrA*_p.*Asp*94*Gly* | *gyrA*_p.*Asp*94*Gly* |
| Sample205 | lineage2.2.1 | - | - | - | *rpsL*_p.*Lys*43*Arg* | - | - | - | - | - | - | - |
| Sample206 | lineage4.2.1.1 | - | - | - | - | - | - | - | - | - | - | - |
| Sample207 | lineage4.5 | - | - | - | - | - | - | - | - | - | - | - |

# **Appendix S8 Supplement Results (Results describe and Table): Comparison of phenotypic resistance and molecular mutation**

We conducted a comparison of the phenotypic resistance status of 11 anti-tuberculosis drugs and the mutation status of the corresponding drug resistance genes. The results revealed a higher mutation rate of the resistance genes in the resistance group of the anti-tuberculosis drugs compared to the sensitivity group. This difference was statistically significant (p-value < 0.05 for all). Additionally, we analyzed the resistance mutation loci of each anti-tuberculosis drug and calculated sensitivity, specificity, diagnostic index, and kappa index. Only the mutation rate of the single katG gene showed a significant difference between the phenotypically H-resistant and susceptible groups (χ2 = 64.4839, P < 0.001). This gene exhibited relatively high sensitivity and specificity (particularly specificity) and a diagnostic index of 151.3925%. Similarly, only the mutation rate of the single rpoB gene differed between the phenotypically R-resistant and susceptible groups (χ2= 64.8912, P < 0.001). This gene also demonstrated relatively high sensitivity and specificity (especially specificity) and a relatively high diagnostic index of 153.8126%. Differences in mutation rates were observed in EMB resistance gene combinations between phenotypically EMB resistant and susceptible groups. This was observed for both single embB gene mutations and combined mutations in the embA and embB genes (all P values below 0.05). The specificities were high (all above 93%), but the sensitivities were low (all below 30%). In terms of the diagnostic index, both indices were not high, but the diagnostic index of single embB gene mutation was higher than that of combined embA and embB gene mutation. For S-resistant gene combinations, the mutation rates of single rpsL gene mutations and single rrs gene mutations differed between phenotypically resistant and susceptible groups (all P values less than 0.05). However, the sensitivity and diagnostic index of single rpsL gene mutations were higher than those of single rrs gene mutations. The mutation rates of single rrs gene mutations differed between the phenotypic resistance and sensitivity groups for both amikacin and capreomycin (all p values < 0.05), with both showing low sensitivity and high specificity. The mutation rates of both single eis and single rrs mutations also differed between the kanamycin phenotypic resistance and sensitivity groups (both p values < 0.05). However, single rrs gene mutations exhibited higher sensitivity and diagnostic index compared to single eis gene mutations. For both O and LFX, there was a difference in the single gyrA mutation rate between the phenotypic resistance and susceptible groups (all p values < 0.05), with the diagnostic index for LFX being higher than that for O. The mutation rates of single gyrA gene mutations and single gyrB gene mutations in MFX, a fluoroquinolone, differed between the phenotypic resistance and susceptibility groups (both P values less than 0.05). However, the diagnostic index of single gyrB gene mutations was much lower than that of single gyrA gene mutations. It should be noted that the diagnostic index for single gyrA gene mutations is specific to MFX and not O and LFX. Additionally, the mutation rates of both single folC mutations and single thyA mutations in the PAS resistance gene combinations did not significantly differ between the phenotypically resistant and sensitive groups (all P values greater than 0.05). Furthermore, after mutated genes with differences in distribution between phenotypically resistant and sensitive groups were compared with the 2nd edition of the WHO mutation catalog, it is noteworthy that the variant C1402A of cross-resistance gene *rrs* of AK, CPM, and KM in sample056 and the variant *Thr*308*Pro* of *katG* in sample028 were not found in the second edition of the WHO mutation catalog. (See **S8.1**-**S8.3**)

## *S8.1 Comparison of phenotypic drug-resistant and molecular drug-resistant*

|  | **Resistance** | |  | **Sensitive** | | ***χ２*** | ***Ｐ*** |
| --- | --- | --- | --- | --- | --- | --- | --- |
|  | **Number of Mutation (N)** | **Rate of Mutation (%)** |  | **Number of Mutation (N)** | **Rate of Mutation (%)** |
| H | 73 | 73.00 |  | 8 | 7.48 | 93.1732 | ＜0.001 |
| R | 35 | 64.81 |  | 15 | 9.80 | 65.9300 | ＜0.001 |
| E | 15 | 36.59 |  | 12 | 7.23 | 24.9823 | ＜0.001 |
| S | 68 | 64.76 |  | 12 | 11.76 | 61.2875 | ＜0.001 |
| O | 46 | 73.02 |  | 11 | 7.64 | 93.8765 | ＜0.001 |
| AK | 3 | 33.33 |  | 3 | 1.52 | - | 0.0011 |
| KM | 5 | 62.50 |  | 4 | 2.00 | - | 0.0011 |
| CPM | 3 | 25.00 |  | 3 | 1.54 | - | 0.0027 |
| PAS | 3 | 14.29 |  | 4 | 2.15 | - | 0.0243 |
| LFX | 43 | 78.18 |  | 14 | 9.21 | 96.2825 | ＜0.001 |
| MFX | 49 | 94.23 |  | 8 | 5.16 | 154.8093 | ＜0.001 |
| H,R,E,S,O,AK,KM,CPM,PAS,LFX and MFX represent Isoniazid,Rifampicin,Ethambutol,Streptomycin,Ofloxacin,Amikacin,Kanamycin,  Capreomycin,Para-aminosalicylic-acid,Levofloxacin and Moxifloxacin respectively; | | | | | | | |
|
|

## *S8.2 Estimation of diagnostic strength of drug resistance in Mycobacterium tuberculosis with different drug resistance gene mutations*

|  | | **Resistance** | |  | **Sensitive** | | ***χ２*** | ***P*** | **Sensitivity (%)** | **Specificity (%)** | **Diagnostic index (%)** | **Kappa index** |
| --- | --- | --- | --- | --- | --- | --- | --- | --- | --- | --- | --- | --- |
| **Mutant** | **Wild** |  | **Mutant** | **Wild** |
| H | - | 73 | 27 |  | 8 | 99 | 93.1732 | ＜0.001 | 73.0000 | 92.5234 | 165.5234 | 0.6593** |
| H | *ahpC* | 1 | 99 |  | 0 | 107 | - | 0.4831# | 1.0000 | 100.0000 | 101.0000 | 0.0103 |
| H | *fabG1* | 6 | 94 |  | 1 | 106 | - | 0.0582# | 6.0000 | 99.0654 | 105.0654 | 0.0522* |
| H | *inhA* | 3 | 97 |  | 0 | 107 | - | 0.1110# | 3.0000 | 100.0000 | 103.0000 | 0.0310 |
| H | *katG* | 57 | 43 |  | 6 | 101 | 64.4839 | ＜0.001 | 57.0000 | 94.3925 | 151.3925 | 0.5202** |
| H | *ahpC* and *fabG1* | 1 | 99 |  | 0 | 107 | - | 0.4831# | 1.0000 | 100.0000 | 101.0000 | 0.0103 |
| H | *ahpC* and *katG* | 2 | 98 |  | 0 | 107 | - | 0.2322# | 2.0000 | 100.0000 | 102.0000 | 0.0207 |
| H | *fabG1* and *inhA* | 1 | 99 |  | 0 | 107 | - | 0.4831# | 1.0000 | 100.0000 | 101.0000 | 0.0103 |
| H | *fabG1* and *katG* | 1 | 99 |  | 0 | 107 | - | 0.4831# | 1.0000 | 100.0000 | 101.0000 | 0.0103 |
| H | *inhA* and *katG* | 1 | 99 |  | 1 | 106 | - | ＞0.9999# | 1.0000 | 99.0654 | 100.0654 | 0.0007 |
| R | - | 35 | 19 |  | 15 | 138 | 65.9300 | ＜0.001 | 64.8148 | 90.1961 | 155.0109 | 0.5636** |
| R | *rpoB* | 34 | 20 |  | 14 | 139 | 64.8912 | ＜0.001 | 62.9630 | 90.8497 | 153.8126 | 0.5582** |
| R | *rpoB* and *rpoC* | 1 | 53 |  | 1 | 152 | - | 0.4546# | 1.8519 | 99.3464 | 101.1983 | 0.0174 |
| E | - | 15 | 26 |  | 12 | 154 | 24.9823 | ＜0.001 | 36.5854 | 92.7711 | 129.3565 | 0.3369** |
| E | *embB* | 12 | 29 |  | 11 | 155 | 4.8508 | ＜0.001$ | 29.2683 | 93.3735 | 122.6418 | 0.2713** |
| E | *embA* and *embB* | 3 | 38 |  | 1 | 165 | - | 0.0252# | 7.3171 | 99.3976 | 106.7147 | 0.1027* |
| S | - | 68 | 37 |  | 12 | 90 | 61.2875 | ＜0.001 | 64.7619 | 88.2353 | 152.9972 | 0.5281** |
| S | *gid* | 4 | 101 |  | 1 | 101 | - | 0.3692# | 3.8095 | 99.0196 | 102.8291 | 0.0279 |
| S | *rpsL* | 54 | 51 |  | 7 | 95 | 49.4403 | ＜0.001 | 51.4286 | 93.1373 | 144.5658 | 0.4429** |
| S | *rrs* | 10 | 95 |  | 2 | 100 | 5.4192 | 0.0199 | 9.5238 | 98.0392 | 107.5630 | 0.0747* |
| S | *gid* and *rrs* | 0 | 105 |  | 1 | 101 | - | 0.4928# | 0.0000 | 99.0196 | 99.0196 | 0.0097 |
| S | *rpsL* and *rrs* | 0 | 105 |  | 1 | 101 | - | 0.4928# | 0.0000 | 99.0196 | 99.0196 | 0.0097 |
| O | - | 46 | 17 |  | 11 | 133 | 93.8765 | ＜0.001 | 73.0159 | 92.3611 | 165.3770 | 0.6718** |
| O | *gyrA* | 43 | 20 |  | 9 | 135 | 89.5730 | ＜0.001 | 68.2540 | 93.7500 | 162.0040 | 0.6521** |
| O | *gyrB* | 1 | 62 |  | 2 | 142 | - | ＞0.9999# | 1.5873 | 98.6111 | 100.1984 | 0.0027 |
| O | *gyrA* and *gyrB* | 2 | 61 |  | 0 | 144 | - | 0.0916# | 3.1746 | 100.0000 | 103.1746 | 0.0436* |
| AK | - | 3 | 6 |  | 3 | 195 | - | 0.0011# | 33.3333 | 98.4848 | 131.8182 | 0.3784** |
| AK | *rrs* | 3 | 6 |  | 3 | 195 | - | 0.0011# | 33.3333 | 98.4848 | 131.8182 | 0.3784** |
| KM | *-* | 5 | 3 |  | 4 | 195 | - | ＜0.001# | 62.5000 | 97.9899 | 160.4899 | 0.5707** |
| KM | *eis* | 2 | 6 |  | 1 | 198 | - | 0.0039# | 25.0000 | 99.4975 | 124.4975 | 0.3499** |
| KM | *rrs* | 3 | 5 |  | 3 | 196 | - | 0.0007# | 37.5000 | 98.4925 | 135.9925 | 0.4090** |
| CPM | *-* | 3 | 9 |  | 3 | 192 | - | 0.0027# | 25.0000 | 98.4615 | 123.4615 | 0.3065** |
| CPM | *rrs* | 3 | 9 |  | 3 | 192 | - | 0.0027# | 25.0000 | 98.4615 | 123.4615 | 0.3065** |
| PAS | *-* | 3 | 18 |  | 4 | 182 | - | 0.0243# | 14.2857 | 97.8495 | 112.1352 | 0.1723** |
| PAS | *folC* | 1 | 20 |  | 0 | 186 | - | 0.1014# | 4.7619 | 100.0000 | 104.7619 | 0.0824* |
| PAS | *thyA* | 2 | 19 |  | 4 | 182 | - | 0.1147# | 9.5238 | 97.8495 | 107.3733 | 0.1079 |
| LFX | *-* | 43 | 12 |  | 14 | 138 | 96.2825 | ＜0.001 | 78.1818 | 90.7895 | 168.9713 | 0.6818** |
| LFX | *gyrA* | 40 | 15 |  | 12 | 140 | 90.2459 | ＜0.001 | 72.7273 | 92.1053 | 164.8325 | 0.6598** |
| LFX | *gyrB* | 1 | 54 |  | 2 | 150 | - | ＞0.9999# | 1.8182 | 98.6842 | 100.5024 | 0.0072 |
| LFX | *gyrA* and *gyrB* | 2 | 53 |  | 0 | 152 | - | 0.0697# | 3.6364 | 100.0000 | 103.6364 | 0.0525* |
| MFX | - | 49 | 3 |  | 8 | 147 | 154.8093 | ＜0.001 | 94.2308 | 94.8387 | 189.0695 | 0.8631** |
| MFX | *gyrA* | 44 | 8 |  | 8 | 147 | 130.6781 | ＜0.001 | 84.6154 | 94.8387 | 179.4541 | 0.7945** |
| MFX | *gyrB* | 3 | 49 |  | 0 | 155 | - | 0.0152# | 5.7692 | 100.0000 | 105.7692 | 0.0840* |
| MFX | *gyrA* and *gyrB* | 2 | 50 |  | 0 | 155 | - | 0.0622# | 3.8462 | 100.0000 | 103.8462 | 0.0565* |
| H,R,E,S,O,AK,KM,CPM,PAS,LFX and MFX represent Isoniazid,Rifampicin,Ethambutol,Streptomycin,Ofloxacin,Amikacin,Kanamycin,Capreomycin,  Para-aminosalicylic-acid,Levofloxacin and Moxifloxacin respectively; | | | | | | | | | | | | |
|
| *:It was significant at the 0.05 level; | | | | | | | | | | | | |
| **:It was significant at the 0.01 level; | | | | | | | | | | | | |
| #:Since the Chi-square test condition is not satisfied, it is calculated by fisher's exact probability method; | | | | | | | | | | | | |
| $:This p-value is obtained using the adjusted Chi-square test. | | | | | | | | | | | | |

## *S8.3 Mutated genes with differences in distribution between phenotypically resistant and sensitive groups were compared with the 2nd edition of the WHO mutation catalog*

| **Antituberculosis drug** | **Gene** | **variant** | **Is it in the 2nd edition of the WHO mutation catalog** |
| --- | --- | --- | --- |
| H | *katG* | c.-10A>C | Yes |
| H | *katG* | p.*Asn*138*Ser* | Yes |
| H | *katG* | p.*Ser*315*Asn* | Yes |
| H | *katG* | p.*Ser*315*Ile* | Yes |
| H | *katG* | p.*Ser*315*Thr* | Yes |
| H | *katG* | p.*Thr*308*Pro* | No |
| H | *katG* | p.*Val*1*Leu* | Yes |
| R | *rpoB* | p.*Asp*435*Tyr* | Yes |
| R | *rpoB* | p.*Asp*435*Val* | Yes |
| R | *rpoB* | p.*Gln*432*Glu* | Yes |
| R | *rpoB* | p.*His*445*Arg* | Yes |
| R | *rpoB* | p.*His*445*Asp* | Yes |
| R | *rpoB* | p.*His*445*Leu* | Yes |
| R | *rpoB* | p.*His*445*Phe* | Yes |
| R | *rpoB* | p.*His*445*Tyr* | Yes |
| R | *rpoB* | p.*Leu*430*Pro* | Yes |
| R | *rpoB* | p.*Leu*452*Pro* | Yes |
| R | *rpoB* | p.*Ser*441Gln | Yes |
| R | *rpoB* | p.*Ser*450*Leu* | Yes |
| R | *rpoB* | p.*His*445*Asn* | Yes |
| R | *rpoB* | p.*Ser*441*Ala* | Yes |
| R | *rpoB* | p.*His*445Gln | Yes |
| R | *rpoB* | p.*Ile*491*Phe* | Yes |
| E | *embB* | p.*Asp*328*Tyr* | Yes |
| E | *embB* | p.Gln497*Arg* | Yes |
| E | *embB* | p.*Gly*406*Ala* | Yes |
| E | *embB* | p.*Gly*406*Ser* | Yes |
| E | *embB* | p.*Met*306*Ile* | Yes |
| E | *embB* | p.*Met*306*Val* | Yes |
| E | *embB* | p.*Asp*1024*Asn* | Yes |
| E | *embB* | p.Gly406Asp | Yes |
| E | *embA* | c.-12C>T | Yes |
| S | *rpsL* | p.*Lys*43*Arg* | Yes |
| S | *rpsL* | p.*Lys*88*Arg* | Yes |
| S | *rrs* | n.514A>C | Yes |
| S | *rrs* | n.517C>T | Yes |
| S | *rrs* | n.799C>T | Yes |
| O | *gyrA* | p.*Ala*90*Val* | No data* |
| O | *gyrA* | p.*Asp*94*Ala* | No data* |
| O | *gyrA* | p.*Asp*94*Asn* | No data* |
| O | *gyrA* | p.*Asp*94*Gly* | No data* |
| O | *gyrA* | p.*Asp*94*His* | No data* |
| O | *gyrA* | p.*Asp*94*Tyr* | No data* |
| O | *gyrA* | p.*Asp*89*Asn* | No data* |
| AK | *rrs* | n.1401A>G | Yes |
| AK | *rrs* | n.1402C>A | No |
| AK | *rrs* | n.1484G>T | Yes |
| KM | *eis* | c.-10G>A | Yes |
| KM | *eis* | c.-12C>T | Yes |
| KM | *eis* | c.-8C>A | Yes |
| KM | *rrs* | n.1401A>G | Yes |
| KM | *rrs* | n.1402C>A | No |
| KM | *rrs* | n.1484G>T | Yes |
| CPM | *rrs* | n.1401A>G | Yes |
| CPM | *rrs* | n.1402C>A | No |
| CPM | *rrs* | n.1484G>T | Yes |
| LFX | *gyrA* | p.*Ala*90*Val* | Yes |
| LFX | *gyrA* | p.*Asp*94*Ala* | Yes |
| LFX | *gyrA* | p.*Asp*94*Asn* | Yes |
| LFX | *gyrA* | p.*Asp*94*Gly* | Yes |
| LFX | *gyrA* | p.*Asp*94*His* | Yes |
| LFX | *gyrA* | p.*Asp*94*Tyr* | Yes |
| LFX | *gyrA* | p.*Asp*89*Asn* | Yes |
| MFX | *gyrA* | p.*Ala*90*Val* | Yes |
| MFX | *gyrA* | p.*Asp*94*Ala* | Yes |
| MFX | *gyrA* | p.*Asp*94*Asn* | Yes |
| MFX | *gyrA* | p.*Asp*94*Gly* | Yes |
| MFX | *gyrA* | p.*Asp*94*His* | Yes |
| MFX | *gyrA* | p.*Asp*94*Tyr* | Yes |
| MFX | *gyrA* | p.*Asp*89*Asn* | Yes |
| MFX | *gyrB* | p.*Glu*501*Asp* | Yes |
| MFX | *gyrB* | p.*Ser*447*Phe* | Yes |
| MFX | *gyrB* | p.*Asn*499*Thr* | Yes |
| MFX | *gyrB* | p.*Asn*499*Lys* | Yes |
| MFX | *gyrB* | p.*Asp*461*His* | Yes |
| *: This drug is not included in the second edition of the WHO mutation catalog | | | |
| H,R,E,S,O,AK,KM,CPM,LFX and MFX represent Isoniazid,Rifampicin,Ethambutol,Streptomycin,Ofloxacin,Amikacin,Kanamycin,Capreomycin, Levofloxacin and Moxifloxacin respectively; | | | |

# **Appendix S9 Supplement Results (Results describe and Table): Phylogenetic analysis**

In order to further explore the genetic structure of the 207 drug-resistant strains and analyze the transmission relationship between patients, we constructed a phylogenetic tree using single nucleotide polymorphisms (SNPs) based on the maximum likelihood method. The best model selection was done using Bayesian Information Criterion (BIC), and the selected model was K3Pu+F out of 50 models (See **S9.1**). Phylogenetic classification of all resistant strains was performed based on SNP barcode nomenclature. The 207 resistant strains could be grouped into three major lineages: lineage 2 (L2, East Asia), lineage 3 (L3, East African Indian,) and lineage 4 (L4, modern MTBC of Europe, America, and Africa), among which the dominant strain is Beijing family (L2.2.1). The proportions of L2, L3, and L4 were 75.36% (156/207), 14.98% (31/207), and 9.66% (20/207), respectively. The dominant strain was Beijing type (L2.2.1) with 68.12% (141/207); followed by L3 (9.66%, 20/207), L4.5 (8.70%, 18/207), and L2.2.2 (7.25%, 15/207); while L4.1, L4.2, L4.3, L4.4, and L4.8 accounted for 0.48% (1/207), 1.93% (4/207), 0.97% (2/207), 1.45% (3/207), and 1.45% (3/207), respectively. The phenotypic resistance status of the different profiles was further analyzed in this study. Phenotypic resistance distribution among different lineages showed that only S, O and MFX in the 11 anti-tuberculosis drugs have differences in resistance distribution among L2, L3 and L4 (P value less than 0.05 for all). To draw further conclusions, a two-by-two comparison of the different lineages was conducted. Considering that the triple splitting of two pair comparisons may increase the probability of making a one-category error, the test level was adjusted downwards to one third of the original level, α = 0.0167 (0.05/3), for two pair comparisons. The results revealed the following: differences in resistance distribution to S and O between L2 and L3 (P values of 0.0016 and 0.0106, respectively). Compared with L2, L3 has higher resistance to S than L2, but lower resistance to O than L2. The resistance distribution status of S, O and MFX did not differ between L2 and L4 (P values greater than 0.0167 for all). Differences in resistance distribution to S between L2 and L3 (P=0.0044). Compared with L4, L3 has higher resistance to S than L4. Taken together, we find S is highest resistance in the L3 and O has the highest resistance in the L2. It is worth mentioning that MR-TB is more likely to occur in the L2 and L4 compared to L3. (**See S9.2-S9.9**)

To explore the transmission relationship among the 207 drug-resistant strains, a clustering analysis was conducted. Strains with genetic distances of less than 12 SNPs were considered as a cluster. As a result, 61 strains were identified as clustered based on genomic SNPs, accounting for a clustering rate of 29.47% (61/207). These 61 clustered strains were further categorized into 14 clusters (C1-C14), with the smallest cluster comprising only 2 strains and the largest cluster containing 21 strains. Among the clustered strains, 52.46% (32/61) were male and 12.56% (26/207) belonged to the ≥60 age group. Additionally, the proportions of individuals with non-farming occupations, floating population (excluding intra-municipal mobility), and retreating population were 96.72% (59/61), 29.51% (18/61), and 29.51% (18/61), respectively. Although the number of strains from the same surveillance site was only 9.84% (6/61), it is worth noting that there was a concentration of administrative units at the district and county level in eight districts and counties of Urumqi city, indicating a high degree of mobility among the city residents. To investigate the correlation in time and space, we utilized the patient's current address and work address as the primary data. We conducted a time-space scanning analysis to examine the spatial heterogeneity. The results revealed that even though the risk ratio after spatio-temporal scanning did not demonstrate statistical significance (P>0.05), 60.66% (37/61) of the 61 SNP-clustered strains still exhibited a spatio-temporal association. An on-site epidemiological investigation of patients without spatial clustering identified that 11 of them were migrants, including two cases who relocated within the city. Hence, the majority of the SNP clusters (78.69%, (11+37)/61) displayed spatial and geographical associations or population flow attributes. Regarding drug resistance types, the proportions of Hr-TB, RR-TB, MR-TB, MDR-TB, Pre-XDR-TB, and Other-DR were 27.87% (17/61), 6.56% (4/61), 24.59% (15/61), 9.84% (6/61), 14.75% (9/61), and 16.39% (10/61), respectively. Subsequently, we examined whether there were disparities in the clustering of each lineage. The analysis indicated no statistical difference in clustering among L2, L3, and L4 (χ2=2.6410, P=0.2670). It is worth noting that the epidemiological investigation results showed that strains in cluster C14 span five years in time (from 2017 to 2021). (**See S9.10-S9.11**)

## *S9.1 Model Selection*

| **No.** | **Model** | **-LnL** | **df** | **AIC** | **AICc** | **BIC** |
| --- | --- | --- | --- | --- | --- | --- |
| 1 | GTR+F | 90866.33 | 389 | 182510.66 | 182533.12 | 185443.64 |
| 2 | GTR+F+I | 90866.36 | 390 | 182512.71 | 182535.29 | 185453.23 |
| 3 | GTR+F+G4 | 90868.81 | 390 | 182517.62 | 182540.19 | 185458.13 |
| 4 | GTR+F+I+G4 | 90868.93 | 391 | 182519.86 | 182542.55 | 185467.91 |
| 5 | GTR+F+R2 | 90866.43 | 391 | 182514.85 | 182537.54 | 185462.91 |
| 6 | GTR+F+R3 | 90866.39 | 393 | 182518.78 | 182541.70 | 185481.91 |
| 7 | GTR+F+I+R2 | 90866.67 | 392 | 182517.35 | 182540.15 | 185472.94 |
| 8 | GTR+F+I+R3 | 90866.59 | 394 | 182521.17 | 182544.21 | 185491.85 |
| 9 | SYM | 91664.65 | 386 | 184101.29 | 184123.40 | 187011.65 |
| 10 | SYM+I | 91664.65 | 387 | 184103.31 | 184125.53 | 187021.21 |
| 11 | TVM+F | 90869.99 | 388 | 182515.98 | 182538.32 | 185441.42 |
| 12 | TVM+F+I | 90870.01 | 389 | 182518.02 | 182540.47 | 185450.99 |
| 13 | TVMe | 91667.10 | 385 | 184104.19 | 184126.18 | 187007.01 |
| 14 | TVMe+I | 91667.14 | 386 | 184106.28 | 184128.39 | 187016.64 |
| 15 | TIM3+F | 91071.65 | 387 | 182917.31 | 182939.53 | 185835.20 |
| 16 | TIM3+F+I | 91071.66 | 388 | 182919.31 | 182941.65 | 185844.75 |
| 17 | TIM3e | 91825.27 | 384 | 184418.54 | 184440.41 | 187313.81 |
| 18 | TIM3e+I | 91825.27 | 385 | 184420.55 | 184442.54 | 187323.37 |
| 19 | TIM2+F | 91065.06 | 387 | 182904.12 | 182926.34 | 185822.01 |
| 20 | TIM2+F+I | 91065.07 | 388 | 182906.13 | 182928.47 | 185831.57 |
| 21 | TIM2e | 91829.61 | 384 | 184427.21 | 184449.09 | 187322.49 |
| 22 | TIM2e+I | 91829.62 | 385 | 184429.23 | 184451.22 | 187332.05 |
| 23 | TIM+F | 90874.85 | 387 | 182523.70 | 182545.92 | 185441.60 |
| 24 | TIM+F+I | 90874.87 | 388 | 182525.73 | 182548.07 | 185451.17 |
| 25 | TIMe | 91812.70 | 384 | 184393.40 | 184415.27 | 187288.68 |
| 26 | TIMe+I | 91812.70 | 385 | 184395.41 | 184417.40 | 187298.22 |
| 27 | TPM3u+F | 91075.32 | 386 | 182922.64 | 182944.75 | 185833.00 |
| 28 | TPM3u+F+I | 91075.32 | 387 | 182924.65 | 182946.87 | 185842.55 |
| 29 | TPM3 | 91827.76 | 383 | 184421.52 | 184443.28 | 187309.25 |
| 30 | TPM3+I | 91827.77 | 384 | 184423.54 | 184445.42 | 187318.82 |
| 31 | TPM2u+F | 91068.72 | 386 | 182909.44 | 182931.54 | 185819.79 |
| 32 | TPM2u+F+I | 91068.72 | 387 | 182911.44 | 182933.66 | 185829.34 |
| 33 | TPM2 | 91832.09 | 383 | 184430.17 | 184451.93 | 187317.91 |
| 34 | TPM2+I | 91832.09 | 384 | 184432.18 | 184454.05 | 187327.46 |
| 35 | K3Pu+F | 90878.51 | 386 | 182529.02 | 182551.12 | 185439.38 |
| 36 | K3Pu+F+I | 90878.51 | 387 | 182531.02 | 182553.25 | 185448.92 |
| 37 | K3P | 91815.18 | 383 | 184396.35 | 184418.11 | 187284.09 |
| 38 | K3P+I | 91815.18 | 384 | 184398.36 | 184420.24 | 187293.64 |
| 39 | TN+F | 91089.55 | 386 | 182951.10 | 182973.21 | 185861.46 |
| 40 | TN+F+I | 91089.56 | 387 | 182953.11 | 182975.34 | 185871.01 |
| 41 | TNe | 91854.22 | 383 | 184474.43 | 184496.19 | 187362.17 |
| 42 | TNe+I | 91854.22 | 384 | 184476.44 | 184498.31 | 187371.72 |
| 43 | HKY+F | 91093.21 | 385 | 182956.43 | 182978.42 | 185859.25 |
| 44 | HKY+F+I | 91093.22 | 386 | 182958.44 | 182980.54 | 185868.79 |
| 45 | K2P | 91856.69 | 382 | 184477.39 | 184499.03 | 187357.59 |
| 46 | K2P+I | 91856.70 | 383 | 184479.40 | 184501.16 | 187367.14 |
| 47 | F81+F | 93930.60 | 384 | 188629.19 | 188651.07 | 191524.47 |
| 48 | F81+F+I | 93930.60 | 385 | 188631.20 | 188653.19 | 191534.02 |
| 49 | JC | 93953.23 | 381 | 188668.46 | 188689.99 | 191541.12 |
| 50 | JC+I | 93953.23 | 382 | 188670.47 | 188692.11 | 191550.67 |

## *S9.2 Comparison of S, O and MFX between L2 and L3*

|  | **Lineage 2** | |  | **Lineage 3** | | ***χ２*** | ***P*** |
| --- | --- | --- | --- | --- | --- | --- | --- |
| **Count (N = 156)** | **Percentage (%)** | **Count (N = 20)** | **Percentage (%)** |
| S | 74 | 47.44 |  | 17 | 85.00 | 10.0174 | 0.0016 |
| O | 51 | 32.69 |  | 1 | 5.00 | 6.5307 | 0.0106 |
| MFX | 40 | 25.64 |  | 1 | 5.00 | 3.1506 | 0.0759# |
| #:This p-value is obtained using the adjusted Chi-square test. | | | | | | | |
| S,O and MFX represent anti-TB drugs Streptomycin,Ofloxacin and Moxifloxacin, respectively. | | | | | | | |

## *S9.3 Comparison of S, O and MFX between L2 and L4*

|  | **Lineage 2** | |  | **Lineage 4** | | ***χ２*** | ***P*** |
| --- | --- | --- | --- | --- | --- | --- | --- |
| **Count (N = 156)** | **Percentage (%)** | **Count (N =31)** | **Percentage (%)** |
| S | 74 | 47.44 |  | 14 | 45.16 | 0.0537 | 0.8167 |
| O | 51 | 32.69 |  | 11 | 35.48 | 0.0909 | 0.7630 |
| MFX | 40 | 25.64 |  | 1 | 3.23 | 1.2632 | 0.2611 |
| S,O and MFX represent anti-TB drugs Streptomycin,Ofloxacin and Moxifloxacin, respectively. | | | | | | | |

## *S9.4 Comparison of S, O and MFX between L3 and L4*

|  | **Lineage 3** | |  | **Lineage 4** | | ***χ２*** | ***P*** |
| --- | --- | --- | --- | --- | --- | --- | --- |
| **Count (N = 20)** | **Percentage (%)** | **Count (N = 31)** | **Percentage (%)** |
| S | 17 | 85 |  | 14 | 45.16 | 8.0943 | 0.0044 |
| O | 1 | 5 |  | 11 | 35.48 | 4.6986 | 0.0302# |
| MFX | 1 | 5.00 |  | 11 | 35.48 | 4.6986 | 0.0302# |
| #:This p-value is obtained using the adjusted Chi-square test. | | | | | | | |
| S,O and MFX represent anti-TB drugs Streptomycin,Ofloxacin and Moxifloxacin, respectively. | | | | | | | |

## *S9.5 Comparison of MR-TB between L2 and L3*

|  | **MR-TB** | |  | **Not MR-TB** | | ***χ２*** | ***P*** |
| --- | --- | --- | --- | --- | --- | --- | --- |
| **Count (n)** | **Percentage (%)** |  | **Count (n)** | **Percentage (%)** |
| Lineage 2 | 33 | 21.15 |  | 123 | 78.85 | 10.8308 | 0.0010 |
| Lineage 3 | 11 | 55.00 |  | 9 | 45.00 |

## *S9.6 Comparison of MR-TB between L2 and L4*

|  | **MR-TB** | |  | **Not MR-TB** | | ***χ２*** | ***P*** |
| --- | --- | --- | --- | --- | --- | --- | --- |
| **Count (n)** | **Percentage (%)** |  | **Count (n)** | **Percentage (%)** |
| Lineage 2 | 33 | 21.15 |  | 123 | 78.85 | 0.0313 | 0.8596 |
| Lineage 4 | 7 | 22.58 |  | 24 | 77.42 |

## *S9.7 Comparison of MR-TB between L2 and L4*

|  | **MR-TB** | |  | **Not MR-TB** | | ***χ２*** | ***P*** |
| --- | --- | --- | --- | --- | --- | --- | --- |
| **Count (n)** | **Percentage (%)** |  | **Count (n)** | **Percentage (%)** |
| Lineage 3 | 11 | 55.00 |  | 9 | 45.00 | 5.5948 | 0.0180 |
| Lineage 4 | 7 | 22.58 |  | 24 | 77.42 |

## *S9.8 Comparison of anti-tuberculosis drug resistance among L2, L3 and L4*

|  | **Lineage 2** | |  | **Lineage 3** | |  | **Lineage 4** | | ***χ２*** | ***Ｐ*** |
| --- | --- | --- | --- | --- | --- | --- | --- | --- | --- | --- |
| **Count (N = 156)** | **Percentage (%)** |  | **Count (N = 20)** | **Percentage (%)** |  | **Count (N =31 )** | **Percentage (%)** |
| H | 81 | 51.92 |  | 5 | 25.00 |  | 14 | 45.16 | 5.2904 | 0.0710 |
| R | 46 | 29.49 |  | 4 | 20.00 |  | 4 | 12.90 | 4.1141 | 0.1278 |
| E | 32 | 20.51 |  | 0 | 0.00 |  | 8 | 25.81 | 5.7676 | 0.0559 |
| S | 74 | 47.44 |  | 17 | 85.00 |  | 14 | 45.16 | 10.4593 | 0.0054 |
| O | 51 | 32.69 |  | 1 | 5.00 |  | 11 | 35.48 | 6.8599 | 0.0324 |
| AK | 7 | 4.49 |  | 0 | 0.00 |  | 2 | 6.45 | 1.2403 | 0.5379* |
| KM | 5 | 3.21 |  | 1 | 5.00 |  | 2 | 6.45 | 0.8065 | 0.6681* |
| CPM | 9 | 5.77 |  | 0 | 0.00 |  | 3 | 9.68 | 2.0756 | 0.3542* |
| PAS | 19 | 12.18 |  | 0 | 0.00 |  | 2 | 6.45 | 3.4138 | 0.1814* |
| LFX | 46 | 29.49 |  | 1 | 5.00 |  | 8 | 25.81 | 5.4591 | 0.0652 |
| MFX | 40 | 25.64 |  | 1 | 5.00 |  | 11 | 35.48 | 6.0969 | 0.0474 |
| * : Obtained by the rank sum test | | | | | | | | | | |
| H,R,E,S,O,AK,KM,CPM,PAS,LFX and MFX represent anti-TB drugs Isoniazid,Rifampicin,Ethambutol,Streptomycin,Ofloxacin,Amikacin, Kanamycin,Capreomycin, Para-aminosalicylic-acid,Levofloxacin and Moxifloxacin, respectively. | | | | | | | | | | |

## *S9.9 Comparison of type of drug resistance among L2, L3 and L4*

|  | **Lineage 2** | |  | **Lineage 3** | |  | **Lineage 4** | | ***χ２*** | ***Ｐ*** |
| --- | --- | --- | --- | --- | --- | --- | --- | --- | --- | --- |
| **Count (N = 156)** | **Percentage (%)** |  | **Count (N = 20)** | **Percentage (%)** |  | **Count (N =31 )** | **Percentage (%)** |
| Hr-TB | 42 | 26.92 |  | 4 | 20.00 |  | 12 | 38.71 | 2.4873 | 0.2883 |
| RR-TB | 6 | 3.85 |  | 3 | 15.00 |  | 2 | 6.45 | 4.4553 | 0.1078* |
| MR-TB | 33 | 21.15 |  | 11 | 55.00 |  | 7 | 22.58 | 10.9671 | 0.0042* |
| PR-TB | 3 | 1.92 |  | 0 | 0.00 |  | 1 | 3.23 | 0.6646 | 0.7173* |
| MDR-TB | 22 | 14.10 |  | 1 | 5.00 |  | 1 | 3.23 | 3.9051 | 0.1419* |
| Pre-XDR-TB | 18 | 11.54 |  | 0 | 0.00 |  | 1 | 3.23 | 4.3599 | 0.1130* |
| Other-DR | 32 | 20.51 |  | 1 | 5.00 |  | 7 | 22.58 | 2.9845 | 0.2249 |
| * : Obtained by the rank sum test | | | | | | | | | | |
| Isoniazid-resistant tuberculosis (Hr-TB) is TB that is resistant to isoniazid but sensitive to rifampicin; | | | | | | | | | | |
| Multidrug-resistant tuberculosis (MDR-TB) is defined as resistance to rifampicin and isoniazid; | | | | | | | | | | |
| Mono-resistant tuberculosis (MR-TB) is defined as resistance to one kind of first-line anti-TB drug; | | | | | | | | | | |
| Pre-extensively drug-resistant tuberculosis (Pre-XDR-TB) is TB that is resistant to rifampicin and any fluoroquinolone (a class of second-line anti-TB drug); | | | | | | | | | | |
| Poly-resistant tuberculosis (PR-TB) is TB that is resistant to at last of first-line anti-TB drug (but not include simultaneous resistance to isoniazid and rifampici); | | | | | | | | | | |
| Rifampicin-resistant tuberculosis (RR-TB) is TB that is resistant to rifampicin(No matter what of resistance to other anti-TB drugs); | | | | | | | | | | |
| Extensively drug-resistant tuberculosis (XDR-TB) is TB that is resistant to rifampicin,plus any fluoroquinolone, plus at least one of the drugs bedaquiline and linezolid; | | | | | | | | | | |
| Other-resistant tuberculosis (Other-DR) is defined as resistance combinations that do not fall within the seven definitions above. | | | | | | | | | | |

## *S9.10 Patient information of 61 cluster strains (including information from field epidemiological investigation)*

| **ID** | **Sex** | **age** | **Occupation** | **Floating population ( without Intra-urban mobility)*** | **Floating population (Intra-urban mobility)#** | **Triage** | **Surveillance sits** | **Year of strain collected** | **Lineages** | **Type of drug resistance** | **Gene cluster** | **Space-time scans into clusters** |
| --- | --- | --- | --- | --- | --- | --- | --- | --- | --- | --- | --- | --- |
| Sample001 | Female | ＜30 | Others | No | No | Re-treatment | High-tech industrial development zone (New urban Area) | 2017 | lineage 2 | Pre-XDR-TB | C11 | M2 |
| Sample003 | Female | ＜30 | Others | No | No | Initial treatment | Satibak zone | 2017 | lineage 2 | Pre-XDR-TB | C14 | No |
| Sample004 | Male | 30-45 | Others | No | No | Re-treatment | Satibak zone | 2017 | lineage 2 | Pre-XDR-TB | C14 | M1 |
| Sample005 | Female | 30-45 | Others | No | No | Initial treatment | Shuimogou district | 2017 | lineage 2 | Pre-XDR-TB | C11 | M2 |
| Sample007 | Female | ＜30 | Others | No | No | Initial treatment | Satibak zone | 2017 | lineage 2 | Other-DR | C9 | M2 |
| Sample008 | Female | ＜30 | Others | No | No | Re-treatment | Satibak zone | 2017 | lineage 2 | Other-DR | C9 | No |
| Sample009 | Male | 45-60 | Others | No | No | Re-treatment | High-tech industrial development zone (New urban Area) | 2017 | lineage 2 | MDR-TB | C2 | M2 |
| Sample017 | Female | ≥60 | Others | No | No | Initial treatment | Tianshan zone | 2017 | lineage 2 | Hr-TB | C10 | No |
| Sample027 | Male | ≥60 | Others | Yes | No | Re-treatment | Tianshan zone | 2017 | lineage 4 | Hr-TB | C7 | No |
| Sample028 | Male | ＜30 | Others | No | No | Initial treatment | Midong zone | 2017 | lineage 2 | MR-TB | C11 | M2 |
| Sample033 | Male | ＜30 | Others | No | No | Re-treatment | Satibak zone | 2017 | lineage 2 | Other-DR | C14 | No |
| Sample035 | Female | 30-45 | Others | No | No | Initial treatment | Satibak zone | 2018 | lineage 2 | MR-TB | C12 | M1 |
| Sample036 | Female | 30-45 | Others | No | No | Re-treatment | Satibak zone | 2018 | lineage 2 | Hr-TB | C14 | No |
| Sample037 | Male | ＜30 | Others | Yes | No | Re-treatment | Satibak zone | 2018 | lineage 2 | Hr-TB | C12 | M1 |
| Sample040 | Male | ≥60 | Others | No | No | Re-treatment | Tianshan zone | 2018 | lineage 4 | Hr-TB | C2 | No |
| Sample044 | Male | ≥60 | Others | Yes | No | Initial treatment | Tianshan zone | 2018 | lineage 3 | MR-TB | C5 | No |
| Sample045 | Male | 45-60 | Others | No | No | Re-treatment | Satibak zone | 2018 | lineage 2 | MDR-TB | C14 | M2 |
| Sample046 | Male | 30-45 | Others | No | No | Initial treatment | Shuimogou zone | 2018 | lineage 2 | RR-TB | C14 | M2 |
| Sample047 | Male | ＜30 | Others | No | No | Initial treatment | Shuimogou zone | 2018 | lineage 2 | Other-DR | C14 | M2 |
| Sample048 | Male | ≥60 | Others | No | No | Initial treatment | High-tech industrial development zone (New urban Area) | 2018 | lineage 3 | MR-TB | C5 | M2 |
| Sample054 | Male | ≥60 | Others | No | No | Re-treatment | Economic and Technological development zone | 2018 | lineage 4 | MR-TB | C3 | No |
| Sample056 | Male | ≥60 | Others | Yes | No | Initial treatment | High-tech industrial development zone (New urban Area) | 2018 | lineage 4 | Hr-TB | C3 | M2 |
| Sample058 | Male | ≥60 | Others | Yes | Yes | Initial treatment | High-tech industrial development zone (New urban Area) | 2018 | lineage 4 | MR-TB | C3 | M2 |
| Sample066 | Female | ＜30 | Others | Yes | No | Initial treatment | Tianshan zone | 2018 | lineage 3 | MR-TB | C6 | No |
| Sample067 | Male | 30-45 | Others | Yes | No | Initial treatment | Tianshan zone | 2018 | lineage 3 | RR-TB | C4 | No |
| Sample068 | Male | ≥60 | Others | Yes | No | Initial treatment | Tianshan zone | 2018 | lineage 2 | RR-TB | C14 | No |
| Sample068 | Male | ＜30 | Others | No | No | Initial treatment | Economic and Technological development zone | 2018 | lineage 3 | MR-TB | C14 | No |
| Sample070 | Female | 30-45 | Others | Yes | No | Re-treatment | Tianshan zone | 2018 | lineage 3 | Hr-TB | C6 | No |
| Sample075 | Female | ≥60 | Others | No | No | Initial treatment | Tianshan zone | 2018 | lineage 2 | MR-TB | C4 | No |
| Sample079 | Male | 45-60 | Others | No | No | Re-treatment | High-tech industrial development zone (New urban Area) | 2018 | lineage 3 | MR-TB | C7 | M2 |
| Sample083 | Male | 30-45 | Others | Yes | No | Initial treatment | Tianshan zone | 2018 | lineage 3 | Hr-TB | C5 | M1 |
| Sample093 | Male | ≥60 | Others | No | No | Re-treatment | Dabancheng zone | 2018 | lineage 3 | MR-TB | C6 | No |
| Sample096 | Female | ＜30 | Others | Yes | No | Re-treatment | Tianshan zone | 2018 | lineage 2 | MR-TB | C6 | No |
| Sample104 | Male | ≥60 | Others | No | No | Initial treatment | Tianshan zone | 2018 | lineage 2 | Pre-XDR-TB | C14 | M1 |
| Sample108 | Male | 45-60 | Others | No | No | Re-treatment | Satibak zone | 2019 | lineage 2 | MR-TB | C14 | M1 |
| Sample116 | Male | 45-60 | Others | Yes | No | Initial treatment | Satibak zone | 2019 | lineage 2 | MDR-TB | C14 | M1 |
| Sample125 | Male | 30-45 | Others | Yes | No | Initial treatment | Satibak zone | 2019 | lineage 2 | Hr-TB | C14 | M1 |
| Sample141 | Female | ≥60 | Others | No | No | Initial treatment | Satibak zone | 2019 | lineage 2 | Other-DR | C14 | M1 |
| Sample145 | Male | ＜30 | Others | No | No | Initial treatment | High-tech industrial development zone (New urban Area) | 2019 | lineage 2 | Hr-TB | C11 | M2 |
| Sample146 | Female | ＜30 | Others | No | Yes | Re-treatment | Midong zone | 2019 | lineage 2 | Hr-TB | C14 | M2 |
| Sample153 | Female | ≥60 | Farmers | No | No | Initial treatment | Midong zone | 2020 | lineage 2 | Other-DR | C10 | M2 |
| Sample155 | Male | 30-45 | Others | No | No | Initial treatment | Midong zone | 2020 | lineage 2 | Other-DR | C8 | M2 |
| Sample158 | Female | 30-45 | Others | No | No | Initial treatment | Tianshan zone | 2020 | lineage 2 | Other-DR | C8 | M1 |
| Sample162 | Male | ≥60 | Others | No | No | Initial treatment | Shuimogou zone | 2020 | lineage 2 | Hr-TB | C14 | M2 |
| Sample163 | Female | ≥60 | Others | No | No | Initial treatment | High-tech industrial development zone (New urban Area) | 2020 | lineage 2 | MDR-TB | C13 | M2 |
| Sample164 | Female | ≥60 | Others | No | No | Initial treatment | High-tech industrial development zone (New urban Area) | 2020 | lineage 2 | Other-DR | C14 | M2 |
| Sample167 | Female | ≥60 | Others | No | No | Initial treatment | Satibak zone | 2021 | lineage 2 | Hr-TB | C14 | M1 |
| Sample168 | Female | ＜30 | Others | No | No | Initial treatment | Shuimogou zone | 2021 | lineage 2 | Hr-TB | C13 | M2 |
| Sample171 | Female | ≥60 | Others | No | No | Initial treatment | Tianshan zone | 2021 | lineage 2 | Pre-XDR-TB | C7 | No |
| Sample172 | Female | ＜30 | Others | No | Yes | Re-treatment | Tianshan zone | 2021 | lineage 4 | MDR-TB | C7 | No |
| Sample176 | Female | ≥60 | Farmers | Yes | No | Initial treatment | Satibak zone | 2021 | lineage 2 | Hr-TB | C1 | No |
| Sample177 | Female | ＜30 | Others | No | Yes | Initial treatment | Satibak zone | 2021 | lineage 4 | RR-TB | C7 | No |
| Sample178 | Male | ≥60 | Others | No | No | Initial treatment | Economic and Technological development zone | 2021 | lineage 2 | Pre-XDR-TB | C1 | No |
| Sample179 | Female | ≥60 | Others | Yes | No | Initial treatment | Satibak zone | 2021 | lineage 4 | Hr-TB | C14 | M2 |
| Sample180 | Female | ＜30 | Others | No | No | Initial treatment | High-tech industrial development zone (New urban Area) | 2021 | lineage 2 | Hr-TB | C3 | M2 |
| Sample181 | Female | ≥60 | Others | Yes | No | Initial treatment | Satibak zone | 2021 | lineage 2 | Pre-XDR-TB | C7 | M1 |
| Sample183 | Female | ≥60 | Others | No | No | Initial treatment | Shuimogou zone | 2021 | lineage 2 | Other-DR | C7 | M1 |
| Sample194 | Male | ≥60 | Others | Yes | No | Initial treatment | Tianshan zone | 2021 | lineage 2 | Pre-XDR-TB | C7 | No |
| Sample195 | Female | ≥60 | Others | No | No | Initial treatment | Tianshan zone | 2021 | lineage 2 | MDR-TB | C14 | No |
| Sample197 | Male | ＜30 | Others | Yes | No | Initial treatment | Midong zone | 2021 | lineage 2 | MR-TB | C14 | M2 |
| Sample200 | Male | 30-45 | Others | No | No | Initial treatment | Shuimogou zone | 2021 | lineage 2 | MR-TB | C11 | M2 |
| * Floating population ( without Intra-urban mobility): Inter-city population movement. | | | | | | | | | | | | |
| # Floating population (Intra-urban mobility): Intra-city population movement. | | | | | | | | | | | | |

## *S9.11 Result of spatiotemporal scan*

| **Cluter** | **Location included** | **Coordinates** | **Radius( km)** | **Time frame** | **Relative risk** | ***P*** |
| --- | --- | --- | --- | --- | --- | --- |
| M1 | Sample035, Sample037,Sample141, Sample125, Sample183,Sample167, Sample004, Sample181,Sample116, Sample083, Sample108,Sample158, Sample104 | 43.807262 N, 87.604670 E | 2.96 | 2018/11/01 to 2019/04/30 | ＜0.001 | 0.0792 |
| M2 | Sample197, Sample146,Sample028, Sample155, Sample153,Sample001, Sample168, Sample145,Sample056, Sample058, Sample005,Sample046, Sample180, Sample079,Sample163, Sample009, Sample200,Sample164, Sample047, Sample162,Sample048, Sample179, Sample007, Sample045 | 43.996060 N, 87.691396 E | 19.61 | 2017/09/01 to 2018/01/31 | 5.2900 | 0.8751 |
